# Supplementary material for: Identification of Driver Genes and Interaction Networks Related to Brain Metastasis in Breast Cancer Patients
Source: Dis Markers. 2022 Jan 28;2022:7631456. doi: 10.1155/2022/7631456 (PMC8817105; doi:10.1155/2022/7631456)
Supplement: Supplementary 1 — Supplementary files 1: 18,810 pairs of PCGs-lncRNAs. [file 7631456.f1.txt]

ferrGene	lncRNA	cor	pvalue	Regulation
ADNP2	ADAMTS9-AS2	-0.709388511954874	1.83449338343213e-06	negative
ANKRD53	ADAMTS9-AS2	0.540191919774506	0.000809184735522221	postive
C18orf25	ADAMTS9-AS2	-0.591119450872031	0.000184677199633724	negative
CCT3	ADAMTS9-AS2	-0.603685544159068	0.000123356460500784	negative
DCTN5	ADAMTS9-AS2	-0.55604659238399	0.000523947144873492	negative
DYM	ADAMTS9-AS2	-0.603882703391957	0.000122561344073646	negative
FAM160A2	ADAMTS9-AS2	0.576703655561796	0.000287579475975888	postive
FAM170A	ADAMTS9-AS2	-0.54575380205157	0.000696450143477975	negative
FARS2	ADAMTS9-AS2	-0.548136547909692	0.000652573345551146	negative
FLAD1	ADAMTS9-AS2	-0.589982290662156	0.000191388887568029	negative
FOXK2	ADAMTS9-AS2	-0.591844308266793	0.000180509768041167	negative
GAB2	ADAMTS9-AS2	0.592944347276517	0.000174346104871609	postive
GGCT	ADAMTS9-AS2	-0.548646482828216	0.000643507900273137	negative
IGLON5	ADAMTS9-AS2	0.577669799814867	0.000279348492448756	postive
IQSEC2	ADAMTS9-AS2	0.632996659910793	4.49077464248484e-05	postive
KHDRBS2	ADAMTS9-AS2	0.626076275563062	5.75372964755429e-05	postive
LIMS2	ADAMTS9-AS2	0.56601697785471	0.000394164716628559	postive
MBLAC1	ADAMTS9-AS2	-0.567358965804145	0.000379087700431117	negative
MCM9	ADAMTS9-AS2	-0.571803288020074	0.000332754897168613	negative
MED23	ADAMTS9-AS2	-0.533186855578196	0.000973939739537879	negative
MEFV	ADAMTS9-AS2	0.555323958628695	0.000534682679199129	postive
METTL18	ADAMTS9-AS2	-0.631911420064364	4.67058673609497e-05	negative
METTL23	ADAMTS9-AS2	-0.538813050921606	0.000839514281615594	negative
MEX3C	ADAMTS9-AS2	-0.61725944934312	7.82334944612623e-05	negative
MON1B	ADAMTS9-AS2	0.5348412112771	0.000932569059568632	postive
MTX1	ADAMTS9-AS2	-0.596618428802332	0.000155102611619758	negative
NFYA	ADAMTS9-AS2	-0.618459836817003	7.50691113535749e-05	negative
OCM2	ADAMTS9-AS2	0.593042148742865	0.000173807346635807	postive
OR2S2	ADAMTS9-AS2	-0.544216912524089	0.000726118416185215	negative
PGLYRP1	ADAMTS9-AS2	-0.548575799476104	0.000644757783503096	negative
PITPNM3	ADAMTS9-AS2	-0.560059176402328	0.000467744831695428	negative
PRM3	ADAMTS9-AS2	0.533288792057393	0.00097134455983342	postive
PRPF31	ADAMTS9-AS2	-0.533723282920333	0.000960351257945412	negative
RAX2	ADAMTS9-AS2	0.565055557146888	0.000405291990824508	postive
SLC27A1	ADAMTS9-AS2	0.596790981153676	0.000154247605972762	postive
SLC35D3	ADAMTS9-AS2	-0.55479284033238	0.000542697097593328	negative
SLC6A19	ADAMTS9-AS2	0.559577848898061	0.000474190842093706	postive
SP100	ADAMTS9-AS2	0.644897222266517	2.89074300459953e-05	postive
SYT2	ADAMTS9-AS2	0.567656958421935	0.000375810327321663	postive
TDRD10	ADAMTS9-AS2	0.553334787040136	0.00056524963651106	postive
TMEM89	ADAMTS9-AS2	0.565739583855538	0.000397346955422811	postive
TMSB4X	ADAMTS9-AS2	0.535362589743711	0.000919856442072783	postive
TRIM8	ADAMTS9-AS2	0.543727587400227	0.000735796377367142	postive
UBQLNL	ADAMTS9-AS2	0.619409924052674	7.264681192228e-05	postive
VPS4B	ADAMTS9-AS2	-0.540549152624542	0.000801486833000283	negative
ZBTB9	ADAMTS9-AS2	-0.622959308817778	6.42078328781625e-05	negative
AATK	ADARB2-AS1	0.570387713347896	0.000346932126123308	postive
ACVR1B	ADARB2-AS1	-0.559330512413227	0.000477533820870388	negative
BEST1	ADARB2-AS1	0.556775444383316	0.000513313548285004	postive
CHADL	ADARB2-AS1	0.536535109180699	0.000891824741655347	postive
CLCA4	ADARB2-AS1	0.564875318378827	0.000407408878984431	postive
CTNNA3	ADARB2-AS1	0.613870829533188	8.78249723940172e-05	postive
DBNDD2	ADARB2-AS1	0.568543394311663	0.000366209824711926	postive
DBX2	ADARB2-AS1	0.549012544483926	0.000637069180568926	postive
DENND1B	ADARB2-AS1	-0.60391603600168	0.000122427373987827	negative
DYNC1I2	ADARB2-AS1	0.554762686359335	0.000543155294418428	postive
GNG8	ADARB2-AS1	0.603249415741816	0.000125131787711559	postive
KCNK16	ADARB2-AS1	0.566566418560595	0.000387928483676851	postive
KLHL20	ADARB2-AS1	-0.594828624939306	0.000164225121096492	negative
KLHL32	ADARB2-AS1	0.541807165793502	0.00077489129184456	postive
KLHL4	ADARB2-AS1	0.536364653784751	0.000895852397853802	postive
KRTCAP3	ADARB2-AS1	-0.585038193400866	0.000223179869795347	negative
LIPE	ADARB2-AS1	0.573334237898972	0.000318005624870938	postive
MAP6D1	ADARB2-AS1	0.567768002993668	0.000374595509545109	postive
NPY2R	ADARB2-AS1	0.570681667604073	0.000343944609962441	postive
OPALIN	ADARB2-AS1	0.56375257053713	0.000420818457162947	postive
PACS2	ADARB2-AS1	0.573318200609166	0.000318157056577825	postive
PREX1	ADARB2-AS1	0.565430039941851	0.000400924997933326	postive
PRR18	ADARB2-AS1	0.604512113118205	0.000120053726859538	postive
RASSF2	ADARB2-AS1	0.553884022895588	0.000556658496617309	postive
ST18	ADARB2-AS1	0.544800111834391	0.000714731101358122	postive
TMEM151A	ADARB2-AS1	0.579300974426896	0.000265928169469901	postive
TNK1	ADARB2-AS1	-0.550323025240405	0.000614484489930297	negative
UGT1A8	ADARB2-AS1	0.547668489964346	0.00066099373768523	postive
ALOXE3	ARHGEF26-AS1	-0.580689194727177	0.000254963518210864	negative
ARHGEF9	ARHGEF26-AS1	0.625494988042461	5.87317022420019e-05	postive
AZU1	ARHGEF26-AS1	-0.551696998907494	0.000591570641341364	negative
C16orf78	ARHGEF26-AS1	-0.587545671131397	0.000206510625818664	negative
CALHM2	ARHGEF26-AS1	-0.615332485547286	8.35650592341209e-05	negative
CAPS	ARHGEF26-AS1	-0.572195018835026	0.000328924010158719	negative
CCDC28A	ARHGEF26-AS1	0.57504304333046	0.000302233880925814	postive
EPHB1	ARHGEF26-AS1	0.584741975791978	0.000225226476114421	postive
FAM50B	ARHGEF26-AS1	0.596418260633155	0.000156099777532589	postive
FIBCD1	ARHGEF26-AS1	-0.565025688975545	0.000405642111626742	negative
FRMD1	ARHGEF26-AS1	-0.541768257993422	0.000775701990485741	negative
GLIS2	ARHGEF26-AS1	-0.567650836238095	0.000375877405410935	negative
GLYAT	ARHGEF26-AS1	-0.564800304458362	0.000408292806891737	negative
GNG13	ARHGEF26-AS1	-0.560481373336856	0.000462154957891654	negative
GPHA2	ARHGEF26-AS1	-0.551800123984294	0.000589881799487688	negative
HMX2	ARHGEF26-AS1	-0.587526806656233	0.000206631754938033	negative
IL18BP	ARHGEF26-AS1	-0.557391231441501	0.000504479357535277	negative
KBTBD12	ARHGEF26-AS1	0.565170160447188	0.000403951082178673	postive
MFAP5	ARHGEF26-AS1	-0.542722245274163	0.000756039176663597	negative
MMP11	ARHGEF26-AS1	-0.601793222013144	0.000131226865399333	negative
NDRG2	ARHGEF26-AS1	0.55167389075264	0.000591949662839092	postive
NPHS2	ARHGEF26-AS1	-0.614772406099097	8.51748846741366e-05	negative
OR8J1	ARHGEF26-AS1	-0.563501131930759	0.000423874804385904	negative
OXR1	ARHGEF26-AS1	0.542624294798816	0.000758037530709721	postive
P2RX1	ARHGEF26-AS1	-0.561318805142771	0.000451242816510886	negative
PRLHR	ARHGEF26-AS1	-0.607951956534606	0.000107145495881349	negative
PRM3	ARHGEF26-AS1	-0.65880830877006	1.68572220993307e-05	negative
PTCHD1	ARHGEF26-AS1	0.550030191687007	0.000619468614562124	postive
RAB40AL	ARHGEF26-AS1	0.603330234511558	0.000124801080948821	postive
SBK2	ARHGEF26-AS1	-0.543670029997516	0.000736942228774379	negative
SLC38A11	ARHGEF26-AS1	0.587962781780397	0.000203848534681248	postive
STAC2	ARHGEF26-AS1	0.597786944406547	0.000149394635495812	postive
TCF23	ARHGEF26-AS1	-0.622946193163358	6.42373159690897e-05	negative
TDRKH	ARHGEF26-AS1	0.549105742041479	0.000635439060459642	postive
VSX1	ARHGEF26-AS1	0.540475261932519	0.000803073747751391	postive
XCL2	ARHGEF26-AS1	-0.542768930143511	0.000755088368352744	negative
XCR1	ARHGEF26-AS1	-0.563386008183856	0.000425280763773442	negative
A4GNT	BCAR4	-0.550719746077924	0.000607788894340329	negative
ABCA8	BCAR4	-0.557283362615414	0.00050601703604264	negative
ANKRD45	BCAR4	-0.539885111447663	0.000815848162564834	negative
CDNF	BCAR4	-0.57857451636644	0.000271832211945186	negative
COL22A1	BCAR4	-0.593884428307277	0.000169228868362421	negative
CRNN	BCAR4	0.673372566459948	9.29782681757638e-06	postive
DNAJC6	BCAR4	-0.543916270842783	0.000732051121563717	negative
GAL3ST1	BCAR4	-0.573177862778118	0.000319484939288278	negative
IQSEC1	BCAR4	0.557056160277176	0.000509269449882522	postive
L3MBTL2	BCAR4	0.575338117468796	0.000299582257601968	postive
MRGPRD	BCAR4	-0.544690203217288	0.000716864962878039	negative
MYOT	BCAR4	-0.596274570355881	0.000156819131059674	negative
NPTX2	BCAR4	-0.593562073926331	0.000170968202131439	negative
PAK4	BCAR4	0.547753059070454	0.000659465246373547	postive
POLR2K	BCAR4	0.533200298723858	0.000973597143409929	postive
RAB4A	BCAR4	-0.57081957717815	0.000342550926251761	negative
RNF152	BCAR4	0.56546959087195	0.000400466233212238	postive
SHC3	BCAR4	-0.545747094649234	0.000696577255624925	negative
SLAIN2	BCAR4	0.53421454446288	0.000948053962701653	postive
SLC22A24	BCAR4	-0.550504959619737	0.000611405844156934	negative
SLC6A7	BCAR4	-0.53300556304217	0.000978570349162688	negative
SMARCA2	BCAR4	-0.653898997813222	2.04549621740637e-05	negative
SRMS	BCAR4	0.534284342053753	0.000946318109748714	postive
STBD1	BCAR4	-0.596924407547939	0.000153589371593738	negative
TAL1	BCAR4	-0.554031991615608	0.000554363878304067	negative
TRIM2	BCAR4	-0.59571234528149	0.000159662440159082	negative
VWC2L	BCAR4	-0.627694391627702	5.43269736716867e-05	negative
ZDHHC15	BCAR4	-0.55822452909782	0.000492739838554956	negative
ZNF28	BCAR4	-0.565776492561692	0.000396922227270563	negative
ABCD2	BPESC1	0.546197017102663	0.000688096151859186	postive
ACBD4	BPESC1	0.61783167495595	7.67103494596833e-05	postive
ACE	BPESC1	0.604947393785708	0.000118346591741185	postive
ADAM29	BPESC1	0.769535006235066	6.57114005663584e-08	postive
ADAM30	BPESC1	0.72898037386956	6.82915584581049e-07	postive
ADAMTS15	BPESC1	0.678713656412581	7.41331353015943e-06	postive
ADAMTS20	BPESC1	0.723604145889363	9.03047329669404e-07	postive
ADCY10	BPESC1	0.825193556104957	1.07396670268275e-09	postive
ADH7	BPESC1	0.805866140228958	5.19567067926538e-09	postive
AFM	BPESC1	0.652368380133615	2.17113040066464e-05	postive
AGTR2	BPESC1	0.779276927878988	3.48742231680066e-08	postive
AIPL1	BPESC1	0.583705785176463	0.000232518354409752	postive
AKR1C4	BPESC1	0.588373577056385	0.00020125680927777	postive
AKT3	BPESC1	0.553359304926168	0.000564863633757525	postive
AMELY	BPESC1	0.535505951567211	0.000916387825495454	postive
ANGPTL3	BPESC1	0.77292251051325	5.29050129474931e-08	postive
ANKLE1	BPESC1	0.600573747263891	0.000136534744688021	postive
ANKRD29	BPESC1	0.740111071811972	3.74873077135888e-07	postive
ANKRD31	BPESC1	0.546619266561469	0.000680220010463556	postive
ANKRD45	BPESC1	0.726193826705363	7.89972460959942e-07	postive
ANKRD60	BPESC1	0.601015407914957	0.000134590525039293	postive
ANO7	BPESC1	0.70488969159121	2.27612627500199e-06	postive
AQP10	BPESC1	0.739628880567952	3.84979543144016e-07	postive
ARHGAP20	BPESC1	0.781553263109911	2.9938052794092e-08	postive
ARHGAP25	BPESC1	0.57578545391111	0.000295601940544087	postive
ARHGEF15	BPESC1	-0.560586153351677	0.000460776905929472	negative
ART3	BPESC1	0.602616366417912	0.000127749542186456	postive
ASB11	BPESC1	0.811982857574695	3.21694289619976e-09	postive
ASB17	BPESC1	0.573485159694408	0.000316583695443934	postive
ATF7IP2	BPESC1	0.658647363611076	1.69654063078222e-05	postive
ATP10A	BPESC1	0.565874509477113	0.00039579625551774	postive
ATP1B4	BPESC1	0.856866431656485	5.08988906468173e-11	postive
ATP2B3	BPESC1	0.588722805750547	0.000199076746069528	postive
ATPAF1	BPESC1	0.68267889055441	6.24699760342304e-06	postive
ATXN3L	BPESC1	0.816401616904865	2.25065382861928e-09	postive
B3GAT2	BPESC1	0.727037085237918	7.56055006084131e-07	postive
B3GNT4	BPESC1	0.693412091313602	3.87794141937068e-06	postive
B4GALT6	BPESC1	0.686021743829814	5.39644795039121e-06	postive
BAAT	BPESC1	0.820426970066487	1.61194016060147e-09	postive
BACH2	BPESC1	0.59350451472374	0.000171280455467552	postive
BNC1	BPESC1	0.682790960603452	6.21661073688928e-06	postive
BNIP1	BPESC1	0.619639068384783	7.20732401071915e-05	postive
BOLL	BPESC1	0.676788991503509	8.04805043160313e-06	postive
BPIFB4	BPESC1	0.732507089799404	5.66519486439586e-07	postive
BPIFB6	BPESC1	0.621345859380543	6.79277263335316e-05	postive
BPIFC	BPESC1	0.756269651784795	1.48463275368204e-07	postive
BPY2B	BPESC1	0.813894717232829	2.75944855204086e-09	postive
C10orf53	BPESC1	0.765614165147008	8.40721023674954e-08	postive
C10orf67	BPESC1	0.805997906039348	5.14320583008208e-09	postive
C10orf88	BPESC1	0.562407837169721	0.000437395169033045	postive
C11orf87	BPESC1	0.560649450032095	0.000459946208025448	postive
C12orf42	BPESC1	0.758849206315284	1.27217486066162e-07	postive
C16orf46	BPESC1	0.557314484256453	0.000505572967891714	postive
C17orf67	BPESC1	0.655124167690483	1.94972489479842e-05	postive
C1orf94	BPESC1	0.770103397827128	6.3380400423121e-08	postive
C2orf50	BPESC1	0.608923911866357	0.000103731653498688	postive
C3orf36	BPESC1	0.718128412234889	1.19250401791748e-06	postive
C4orf36	BPESC1	0.690209667390482	4.4802099674653e-06	postive
C4orf46	BPESC1	0.644331134948047	2.95320859581017e-05	postive
C6orf201	BPESC1	0.735962053921634	4.70418660304337e-07	postive
C7orf33	BPESC1	0.548547473622607	0.000645259268909754	postive
C7orf57	BPESC1	0.820271362724353	1.63312333073424e-09	postive
C9orf57	BPESC1	0.534511718053453	0.000940682751660093	postive
CABS1	BPESC1	0.727795142904251	7.26709808167992e-07	postive
CACNG5	BPESC1	-0.615154714570264	8.40730302372928e-05	negative
CAGE1	BPESC1	0.67385777925918	9.11018850261919e-06	postive
CAMSAP1	BPESC1	0.596346127943804	0.000156460523175998	postive
CBLN4	BPESC1	0.697431263673352	3.22684974672575e-06	postive
CCDC114	BPESC1	-0.539727012343096	0.000819300746856516	negative
CCDC158	BPESC1	0.569893451056834	0.000352007578991478	postive
CCDC54	BPESC1	0.554517893248433	0.000546887712460595	postive
CCDC60	BPESC1	0.6995251977067	2.92874596757295e-06	postive
CCDC62	BPESC1	0.673007284063607	9.44139883976659e-06	postive
CCDC70	BPESC1	0.741212578777193	3.52693689773981e-07	postive
CCL25	BPESC1	0.72252332310747	9.54482758087978e-07	postive
CD209	BPESC1	0.555344150465845	0.000534380074747107	postive
CDH8	BPESC1	0.612067195813826	9.33504036265683e-05	postive
CDHR5	BPESC1	0.590127734658709	0.000190518448623765	postive
CDKL4	BPESC1	0.752424209907253	1.86251377923922e-07	postive
CDKN2B	BPESC1	0.602192236142682	0.000129530783416909	postive
CDNF	BPESC1	0.586256948017607	0.000214933206821895	postive
CDRT15	BPESC1	0.662159155357565	1.47423832727611e-05	postive
CELF6	BPESC1	0.667482761528259	1.18734065331428e-05	postive
CEP97	BPESC1	0.688936631697113	4.742453114967e-06	postive
CER1	BPESC1	0.759291176651685	1.23871663504778e-07	postive
CFHR2	BPESC1	0.724967882993976	8.41775381965183e-07	postive
CFHR5	BPESC1	0.688423345430543	4.85209266872977e-06	postive
CHRNA7	BPESC1	0.629876875895345	5.02530502566552e-05	postive
CILP2	BPESC1	0.736500629019918	4.5686543499054e-07	postive
CLEC18A	BPESC1	0.78231275777658	2.84403367276639e-08	postive
CLVS1	BPESC1	0.768731437888028	6.91418995688891e-08	postive
CNBP	BPESC1	0.559269944885177	0.000478355632174206	postive
CNGB1	BPESC1	0.733776311532072	5.29298489819963e-07	postive
CNGB3	BPESC1	0.699947439777813	2.87177130679566e-06	postive
CNNM1	BPESC1	0.702438753540694	2.55572057835485e-06	postive
CNPPD1	BPESC1	0.698677352616348	3.04627874905202e-06	postive
COG6	BPESC1	0.556849059926388	0.000512250265487143	postive
COL20A1	BPESC1	0.743226950747291	3.1522341737369e-07	postive
COL22A1	BPESC1	0.621988166839381	6.64241924279352e-05	postive
CPA2	BPESC1	0.709916656362267	1.78815194961949e-06	postive
CPLX2	BPESC1	0.545663941875529	0.000698154792866546	postive
CPLX4	BPESC1	0.588482911471853	0.000200572001781938	postive
CPO	BPESC1	0.652135222247059	2.19087034986932e-05	postive
CREG2	BPESC1	0.766628202373319	7.89175142915822e-08	postive
CRISP1	BPESC1	0.696869451539048	3.31141503072917e-06	postive
CRISP3	BPESC1	0.661401739393689	1.5198132304585e-05	postive
CRYBA4	BPESC1	0.617537494209372	7.74900281672606e-05	postive
CRYGD	BPESC1	0.548083901907784	0.000653515681909868	postive
CSH2	BPESC1	0.800715572205116	7.6801227191567e-09	postive
CSMD2	BPESC1	0.626834450205543	5.60123723446836e-05	postive
CSN2	BPESC1	0.716281276202208	1.30787099645853e-06	postive
CSNK1G1	BPESC1	0.558568771759955	0.000487961422669424	postive
CXorf51A	BPESC1	0.76347493079717	9.59791208768709e-08	postive
CXorf58	BPESC1	0.72136365237213	1.01264561717552e-06	postive
CYB5D1	BPESC1	0.661851945950852	1.49257183486703e-05	postive
CYLC1	BPESC1	0.687815425040195	4.98493389026227e-06	postive
CYP1A1	BPESC1	0.670674373072192	1.04069262956817e-05	postive
CYP2C19	BPESC1	0.705831255278683	2.17636863452296e-06	postive
CYP2E1	BPESC1	0.561278643644333	0.000451760862518851	postive
CYP7A1	BPESC1	0.764517069110544	8.99970204155452e-08	postive
CYSLTR2	BPESC1	0.798468755196805	9.07567825660963e-09	postive
DAOA	BPESC1	0.722134828283746	9.73617360510404e-07	postive
DCDC1	BPESC1	0.88349962252733	2.09456871693558e-12	postive
DCHS2	BPESC1	0.726511302535845	7.77042552914455e-07	postive
DDHD1	BPESC1	0.534137385157408	0.000949976170494127	postive
DDX53	BPESC1	0.739834412391749	3.80641493473874e-07	postive
DEFB106B	BPESC1	0.544156434524914	0.000727308426042443	postive
DEFB125	BPESC1	0.779904298324669	3.34437352321554e-08	postive
DKKL1	BPESC1	0.750446834844673	2.08955033704232e-07	postive
DLEU7	BPESC1	0.688780325763433	4.77559884592549e-06	postive
DMRT3	BPESC1	0.575694002754884	0.000296411796727266	postive
DNAJB7	BPESC1	0.752561941854638	1.84757827789334e-07	postive
DNAJB8	BPESC1	-0.577151607522246	0.000283736649938755	negative
DNAJC3	BPESC1	0.76293417217395	9.92255440966895e-08	postive
DNAJC6	BPESC1	0.702505110400839	2.54775502631792e-06	postive
DNER	BPESC1	0.578426781332805	0.000273047102442563	postive
DOCK10	BPESC1	0.718019839630419	1.19901833659279e-06	postive
DOCK8	BPESC1	0.729217510019631	6.74449535028023e-07	postive
DRD4	BPESC1	0.536636310851186	0.000889441042328139	postive
DSC1	BPESC1	0.812995114301554	2.96663466837621e-09	postive
DSG3	BPESC1	0.70019752461418	2.83850575161847e-06	postive
DSG4	BPESC1	0.77601193580326	4.3274341595746e-08	postive
DSPP	BPESC1	0.622907983219789	6.43232788916846e-05	postive
DSTYK	BPESC1	0.721832301422048	9.88760519018102e-07	postive
DTHD1	BPESC1	0.805093151714436	5.51355871642114e-09	postive
DTX2	BPESC1	0.762344725491567	1.0287927612407e-07	postive
DUSP21	BPESC1	0.658182364794158	1.72815190970408e-05	postive
DZIP1L	BPESC1	0.694256139030645	3.73201856264358e-06	postive
EBNA1BP2	BPESC1	0.751196980487209	2.00058255732719e-07	postive
ECT2L	BPESC1	0.615630715942056	8.27190845533601e-05	postive
EDDM3A	BPESC1	0.767020976545113	7.70004366720394e-08	postive
EID3	BPESC1	0.587099140465835	0.000209394921094621	postive
ELAVL4	BPESC1	0.551129600301928	0.000600939662607691	postive
EMD	BPESC1	0.691459981362672	4.23559027399681e-06	postive
ETV3L	BPESC1	0.540154520805431	0.000809994402460023	postive
EXOC4	BPESC1	0.58837588273118	0.000201242346292552	postive
EXOC6B	BPESC1	0.569381835336788	0.000357330820823959	postive
F13B	BPESC1	0.622114912394511	6.61310710573475e-05	postive
F3	BPESC1	0.709273353109705	1.84474263544676e-06	postive
FABP2	BPESC1	0.803858024695927	6.05906734351272e-09	postive
FADS6	BPESC1	-0.690662489503566	4.39016663134545e-06	negative
FAM13C	BPESC1	0.64162931795417	3.26851330245392e-05	postive
FAM205A	BPESC1	0.654932394735496	1.96444204328127e-05	postive
FAM71E2	BPESC1	0.693369010631361	3.88552721930692e-06	postive
FAM98B	BPESC1	0.73855323201031	4.08432699478684e-07	postive
FBXL8	BPESC1	0.602930570670839	0.000126444177303094	postive
FCER1A	BPESC1	0.585574244867819	0.000219518462843144	postive
FCER1G	BPESC1	0.648961637269032	2.47623016602065e-05	postive
FCRL1	BPESC1	0.556898379736511	0.000511538998394357	postive
FERMT1	BPESC1	0.787982152992247	1.92631108226701e-08	postive
FNDC5	BPESC1	0.635680533454961	4.0726337063719e-05	postive
FNDC7	BPESC1	0.658658653693806	1.69577968333627e-05	postive
FOXI1	BPESC1	0.655480279195066	1.92266097969881e-05	postive
FRMD6	BPESC1	0.550721697403867	0.000607756121663675	postive
FRMPD3	BPESC1	-0.5895268197964	0.000194137827275496	negative
FSCB	BPESC1	0.701193159792261	2.70953029153538e-06	postive
FSHB	BPESC1	0.594909397790945	0.00016380328822518	postive
FSTL5	BPESC1	0.629376656582769	5.11616070668571e-05	postive
GABRA4	BPESC1	0.851380542353136	9.06987328663325e-11	postive
GAL3ST1	BPESC1	0.64349030479577	3.04824815462323e-05	postive
GALP	BPESC1	0.590985653600744	0.000185455794111985	postive
GAPDHS	BPESC1	0.72663142414733	7.72201148782706e-07	postive
GCG	BPESC1	0.711684822370769	1.64069022754704e-06	postive
GCM1	BPESC1	-0.582224260775189	0.000243310830916345	negative
GFRAL	BPESC1	0.811508681400042	3.3407993125092e-09	postive
GHRHR	BPESC1	-0.64680911484649	2.6885135779326e-05	negative
GIPR	BPESC1	-0.536588815903597	0.000890559034323167	negative
GJA10	BPESC1	0.77404273166994	4.92052293519055e-08	postive
GK	BPESC1	0.697134225624066	3.27131167968703e-06	postive
GK2	BPESC1	0.764322867232375	9.10850474788984e-08	postive
GKN1	BPESC1	0.718454505373298	1.17313293570897e-06	postive
GLIPR1L1	BPESC1	0.821050327170998	1.52960886764517e-09	postive
GLP1R	BPESC1	0.682213241464601	6.37470932510021e-06	postive
GNG3	BPESC1	0.745491144802279	2.7749446485318e-07	postive
GNRHR	BPESC1	0.784620097957225	2.43040039078362e-08	postive
GOLGA1	BPESC1	-0.601513030650837	0.000132429756622956	negative
GPR101	BPESC1	0.797208877385055	9.95735615440642e-09	postive
GPR21	BPESC1	0.61406743184815	8.72408361693116e-05	postive
GPR31	BPESC1	-0.534100902031738	0.000950886242528914	negative
GPR82	BPESC1	0.633381194986444	4.42857780240921e-05	postive
GPX6	BPESC1	0.74829895132485	2.36481038571878e-07	postive
GRIK1	BPESC1	0.798440761633238	9.09445769934841e-09	postive
GRK1	BPESC1	0.635182220583622	4.14750130370775e-05	postive
GRK7	BPESC1	0.752071087911567	1.901314859444e-07	postive
GRXCR1	BPESC1	0.68588214338654	5.4297395684347e-06	postive
GUCY2D	BPESC1	0.555940457344926	0.000525511809262847	postive
GUCY2F	BPESC1	0.772833408719983	5.32100377994953e-08	postive
GYS2	BPESC1	0.744274399345785	2.97219435991713e-07	postive
H6PD	BPESC1	0.73849716046109	4.09690518197168e-07	postive
HDDC2	BPESC1	0.673188286330101	9.37000682894454e-06	postive
HECTD3	BPESC1	0.732789764847828	5.58027827773944e-07	postive
HHLA1	BPESC1	0.670499548684161	1.0482777622614e-05	postive
HHLA2	BPESC1	0.639379015878131	3.55403832088998e-05	postive
HIPK4	BPESC1	0.571693840085485	0.000333832316037812	postive
HNF4A	BPESC1	0.587800077783877	0.000204883271515206	postive
HOXC4	BPESC1	0.552764440120065	0.00057429532546267	postive
HOXD12	BPESC1	0.577721083739402	0.000278917522215199	postive
HRH4	BPESC1	0.746557150917887	2.61209777796586e-07	postive
HSD3B7	BPESC1	0.609410880261853	0.000102058299695057	postive
HSFY2	BPESC1	0.778134111108694	3.7626056679828e-08	postive
HTN3	BPESC1	0.691873845096002	4.15734433753703e-06	postive
HTR3B	BPESC1	0.544338421337527	0.000723732727717592	postive
IFNA10	BPESC1	0.673442677675049	9.27049832078708e-06	postive
IFNA16	BPESC1	0.63681988940245	3.90602297599966e-05	postive
IFNA8	BPESC1	0.587111882527662	0.000209312118706788	postive
IFNK	BPESC1	0.800046501192987	8.07339338798422e-09	postive
IFNW1	BPESC1	0.638861246006326	3.62284607261231e-05	postive
IL15	BPESC1	0.614958328219462	8.46374237783008e-05	postive
IL2	BPESC1	0.624257470431262	6.13493070595939e-05	postive
IL23R	BPESC1	0.84061702626578	2.64221575762736e-10	postive
IL3	BPESC1	0.746508392164259	2.61935027786655e-07	postive
IL31RA	BPESC1	0.629466344298099	5.0997622767598e-05	postive
IL9	BPESC1	0.596912268857989	0.000153649151240879	postive
IL9R	BPESC1	0.586164118970075	0.000215551601099522	postive
IMPG1	BPESC1	0.877369463317936	4.65607147800589e-12	postive
INSL6	BPESC1	0.776284501497143	4.25075110782467e-08	postive
IQCF1	BPESC1	0.722395121625238	9.60758646124443e-07	postive
IQCF5	BPESC1	0.795301744811887	1.14436523848865e-08	postive
IRF8	BPESC1	0.787113666800803	2.04633334879859e-08	postive
IRS4	BPESC1	0.802659576771241	6.63572942970338e-09	postive
ISL1	BPESC1	0.650308815039716	2.3512194034836e-05	postive
ITCH	BPESC1	0.626980254179963	5.57233312570157e-05	postive
ITGAX	BPESC1	0.585535593828705	0.000219780653331864	postive
KCNG2	BPESC1	0.742324173485456	3.31539112607548e-07	postive
KCNH7	BPESC1	0.630240632405758	4.96015289361321e-05	postive
KCNK18	BPESC1	0.796605866296041	1.04067923518798e-08	postive
KCTD16	BPESC1	0.716719896470261	1.27958688360674e-06	postive
KIR2DL4	BPESC1	-0.592222861533027	0.000178367005151216	negative
KISS1	BPESC1	0.568451167787121	0.000367198392860885	postive
KLC3	BPESC1	0.578162580889805	0.000275231833212281	postive
KLF17	BPESC1	0.741749234914784	3.4233054267485e-07	postive
KLHL18	BPESC1	0.63896748989151	3.60862959967587e-05	postive
KLHL28	BPESC1	-0.681932523752871	6.45284532252648e-06	negative
KLK2	BPESC1	0.597801901992633	0.00014932280840632	postive
KLRF2	BPESC1	0.767766173096836	7.34806920803772e-08	postive
KRT25	BPESC1	0.642103480267313	3.21106551447673e-05	postive
KRT26	BPESC1	0.753554108246178	1.74320174955929e-07	postive
KRT82	BPESC1	0.668320485897251	1.14713373299047e-05	postive
KRTAP1-3	BPESC1	0.724499100052356	8.6239380974121e-07	postive
KRTAP13-3	BPESC1	0.56297728338895	0.000430305926891908	postive
KRTAP3-3	BPESC1	0.764865686762682	8.80738591282619e-08	postive
KRTAP4-3	BPESC1	0.737053072082371	4.43336516974599e-07	postive
KRTAP4-4	BPESC1	0.785517912136674	2.28504353726846e-08	postive
KRTAP4-6	BPESC1	0.597588824325591	0.000150348946138192	postive
KRTAP4-9	BPESC1	0.685532927232931	5.51384150482576e-06	postive
KRTAP9-3	BPESC1	0.776557636857175	4.17516706169278e-08	postive
KRTAP9-8	BPESC1	0.683476122386693	6.03374485558434e-06	postive
LCE1B	BPESC1	0.821829392689226	1.43219218560598e-09	postive
LCN1	BPESC1	0.685230024397965	5.58774959820715e-06	postive
LCN6	BPESC1	0.582031338153072	0.000244748666292843	postive
LCT	BPESC1	0.670431079440495	1.05126212291805e-05	postive
LDHAL6A	BPESC1	0.791673971246974	1.4851594355014e-08	postive
LDHAL6B	BPESC1	0.800587122799082	7.75422069137425e-09	postive
LGALS16	BPESC1	0.559185288186151	0.00047950640391329	postive
LGI2	BPESC1	0.677025124573654	7.96759955489402e-06	postive
LGSN	BPESC1	0.560375136888309	0.000463555904178443	postive
LHCGR	BPESC1	0.722472669889236	9.56957897757715e-07	postive
LHX3	BPESC1	0.739859293863598	3.80119391717299e-07	postive
LHX5	BPESC1	0.795957149981173	1.09111855409546e-08	postive
LHX9	BPESC1	0.647717307841667	2.59701493647097e-05	postive
LMOD3	BPESC1	0.600028245767278	0.00013897084889649	postive
LRIT2	BPESC1	0.680558170157472	6.84813167990449e-06	postive
LRRC3	BPESC1	0.608741452619174	0.000104364957356723	postive
LRRC3C	BPESC1	0.675153853219103	8.62574774886277e-06	postive
LRRC8B	BPESC1	0.602916628056079	0.000126501847123156	postive
LRRN3	BPESC1	0.68280728260657	6.21219641410803e-06	postive
LRTM1	BPESC1	0.654622865046328	1.9884088151538e-05	postive
LY6H	BPESC1	0.634329077324982	4.27857199229973e-05	postive
LYZL6	BPESC1	0.707330896193723	2.02570853828236e-06	postive
MAGEB3	BPESC1	0.613208631836562	8.98184510829834e-05	postive
MAGEB4	BPESC1	0.564878277765947	0.000407374041940421	postive
MAP2	BPESC1	0.58085119141325	0.000253710701097884	postive
MARK2	BPESC1	0.639475025579321	3.54141003662938e-05	postive
MAS1	BPESC1	0.799563587230476	8.36872758898042e-09	postive
MCF2L2	BPESC1	0.645069099601636	2.87201515378615e-05	postive
MCHR1	BPESC1	0.800420710618186	7.85120145823854e-09	postive
METTL4	BPESC1	0.616944995402969	7.90820512808394e-05	postive
MLH3	BPESC1	-0.566228687578614	0.000391751289069132	negative
MLLT1	BPESC1	0.615195775294442	8.39554551929923e-05	postive
MMP20	BPESC1	0.566782213332379	0.000385503310623451	postive
MORN5	BPESC1	0.727093228406188	7.53844947046324e-07	postive
MOV10L1	BPESC1	0.668943046509275	1.11805976666178e-05	postive
MRGPRD	BPESC1	0.605113281350313	0.000117701754815703	postive
MSTN	BPESC1	0.767530778382321	7.45761592174761e-08	postive
MTNR1A	BPESC1	0.629015605763646	5.18265756925393e-05	postive
MTNR1B	BPESC1	0.655790533981494	1.89936036096697e-05	postive
MYADML2	BPESC1	0.595533698918155	0.000160575524969294	postive
MYF5	BPESC1	0.814755209999672	2.57388742448115e-09	postive
MYH1	BPESC1	0.656593109701155	1.84026917252552e-05	postive
MYLK3	BPESC1	0.802697336436782	6.61681149810733e-09	postive
MYO3B	BPESC1	0.754381314388956	1.66035668726009e-07	postive
MYOT	BPESC1	0.666199816426624	1.25140353922839e-05	postive
NAIF1	BPESC1	0.551012051925036	0.000602897023008101	postive
NALCN	BPESC1	0.665179070010279	1.3045999566942e-05	postive
NECAB2	BPESC1	0.797557724802545	9.70561786442523e-09	postive
NEIL2	BPESC1	0.708288291334043	1.93457854647839e-06	postive
NEXN	BPESC1	0.625438085666365	5.88498164390111e-05	postive
NHLH1	BPESC1	0.616456978927605	8.04153894022735e-05	postive
NHLRC4	BPESC1	0.708925224045788	1.87604583793066e-06	postive
NIPAL3	BPESC1	0.629452492011888	5.10229191528626e-05	postive
NKAIN3	BPESC1	0.629342830208037	5.1223578456147e-05	postive
NOXRED1	BPESC1	0.548487022587942	0.000646330659829277	postive
NPTX2	BPESC1	0.555611039394779	0.000530394613310678	postive
NPVF	BPESC1	-0.567980998803748	0.000372275138543259	negative
NR1I3	BPESC1	0.682560829022583	6.27915533802128e-06	postive
NR4A3	BPESC1	0.681182582122107	6.66588514626848e-06	postive
NTSR1	BPESC1	0.609106032140738	0.000103102973721183	postive
NXNL1	BPESC1	-0.587619520993008	0.000206037045619819	negative
ODF1	BPESC1	0.568456337337753	0.000367142918069073	postive
OIT3	BPESC1	0.559451403815806	0.000475897255155296	postive
OLIG2	BPESC1	0.716460318978329	1.29625711849993e-06	postive
OPRK1	BPESC1	0.79297158418232	1.35374197877492e-08	postive
OPRM1	BPESC1	0.571106071026298	0.000339671761422879	postive
OR10H1	BPESC1	-0.600792673395491	0.000135567889208594	negative
OR10H3	BPESC1	0.53323969458213	0.000972593759513942	postive
OR11H12	BPESC1	0.760014682526354	1.1856896498014e-07	postive
OR1A1	BPESC1	0.735820545111439	4.74040446904562e-07	postive
OR1E1	BPESC1	0.631922139332822	4.66877933306838e-05	postive
OR1S2	BPESC1	0.568708356491161	0.000364447520747472	postive
OR2H2	BPESC1	0.700070150529844	2.85540443464545e-06	postive
OR2J2	BPESC1	-0.541308343502752	0.000785341961990124	negative
OR2L13	BPESC1	0.803948795792892	6.0173374613699e-09	postive
OR2W3	BPESC1	0.711408074247412	1.66301030029328e-06	postive
OR3A1	BPESC1	0.582072286081257	0.000244442851711861	postive
OR4C15	BPESC1	-0.535205550550862	0.000923669280400287	negative
OR4C46	BPESC1	0.749320987845523	2.22992351670618e-07	postive
OR4K17	BPESC1	0.674640563102121	8.8147269175877e-06	postive
OR51A7	BPESC1	0.646001166328615	2.7723561793356e-05	postive
OR51B2	BPESC1	0.663777749933455	1.38097771379236e-05	postive
OR5A1	BPESC1	-0.594864289952356	0.000164038742143466	negative
OR5L2	BPESC1	0.666135741097924	1.25468393774736e-05	postive
OR5P3	BPESC1	0.822232938670505	1.38402365143783e-09	postive
OR6M1	BPESC1	-0.571132444173047	0.000339407807755173	negative
OR6N1	BPESC1	0.701605960153518	2.65764403222935e-06	postive
OTOGL	BPESC1	0.839793199663787	2.85823046129405e-10	postive
OTUD7B	BPESC1	0.601539878513042	0.000132314068676303	postive
P2RX6	BPESC1	0.700867871390383	2.75106710238644e-06	postive
PAPOLB	BPESC1	0.806980149327856	4.76728811735876e-09	postive
PAPPA2	BPESC1	0.75441994102902	1.65657824455326e-07	postive
PATE1	BPESC1	0.724985078232863	8.41027750870935e-07	postive
PCDH11X	BPESC1	0.715574335535419	1.35466468550859e-06	postive
PCDH15	BPESC1	0.71761606753434	1.22353155608768e-06	postive
PCF11	BPESC1	0.672434865116901	9.67044523428735e-06	postive
PDE4B	BPESC1	0.541402236444196	0.000783365369186442	postive
PDZD9	BPESC1	0.768819082227087	6.87598765562176e-08	postive
PEX11G	BPESC1	0.669031343162348	1.11399095363144e-05	postive
PGGT1B	BPESC1	0.54134948471104	0.000784475333100326	postive
PGK2	BPESC1	0.574178987349365	0.000310119399449256	postive
PIK3AP1	BPESC1	0.700987535346649	2.7357197722737e-06	postive
PLEKHG1	BPESC1	0.649349767145927	2.43961030202514e-05	postive
PLIN4	BPESC1	0.602124614767415	0.00012981682794437	postive
PLSCR2	BPESC1	0.707882532683251	1.97273287851069e-06	postive
PM20D1	BPESC1	0.740111407925029	3.74866118202078e-07	postive
PNPLA1	BPESC1	0.619566772228306	7.22537626567417e-05	postive
PODN	BPESC1	0.746021111939097	2.69285337893457e-07	postive
POMT1	BPESC1	0.5356665879032	0.000912514980313647	postive
POU1F1	BPESC1	0.685186722946287	5.59838857878292e-06	postive
PPEF2	BPESC1	0.802536140421034	6.69792189095e-09	postive
PPP1R12B	BPESC1	0.685786841263703	5.45257443696275e-06	postive
PPP1R14C	BPESC1	0.68091174961747	6.74438316697082e-06	postive
PRAMEF1	BPESC1	0.667523837405216	1.18533972303084e-05	postive
PREX2	BPESC1	0.559347033207512	0.000477309876180573	postive
PRKCQ	BPESC1	0.720560754891533	1.05479809172558e-06	postive
PROKR2	BPESC1	-0.734737104092337	5.0263006857322e-07	negative
PRY2	BPESC1	0.580278977656311	0.000258160726288065	postive
PSG11	BPESC1	0.730725042031055	6.22841326304495e-07	postive
PSMA8	BPESC1	0.815511843551359	2.42034393511537e-09	postive
PSORS1C1	BPESC1	0.619849091045015	7.15511190080187e-05	postive
PSORS1C2	BPESC1	0.585789441580756	0.00021806377799294	postive
PTH	BPESC1	0.684960293647177	5.65432260697681e-06	postive
PTH2	BPESC1	0.552095547351424	0.000585067407705403	postive
PTPN5	BPESC1	0.570804620721781	0.000342701829161353	postive
PTPRO	BPESC1	0.795656049845057	1.11528956297698e-08	postive
PXT1	BPESC1	0.56634699336974	0.000390408376368427	postive
PZP	BPESC1	0.555502844873462	0.000532007093668672	postive
RAD9A	BPESC1	0.648411380400358	2.52900038773754e-05	postive
RADIL	BPESC1	0.573919757233185	0.000312520700589963	postive
RAG2	BPESC1	0.687622067184058	5.0278759694852e-06	postive
RASAL1	BPESC1	0.651682637330246	2.22965285171018e-05	postive
RASAL3	BPESC1	0.607154690791931	0.000110020796250298	postive
RASGRP4	BPESC1	-0.552419817667193	0.00057982306569715	negative
RAVER2	BPESC1	0.593383867631158	0.00017193661343137	postive
RBMXL3	BPESC1	0.729111965027293	6.78205659329464e-07	postive
RFPL3	BPESC1	0.548256120863084	0.000650437522939499	postive
RFPL4B	BPESC1	0.713439295940142	1.50544964224735e-06	postive
RFT1	BPESC1	0.752992848395696	1.80155993413935e-07	postive
RFX6	BPESC1	0.556594946147658	0.00051592891547688	postive
RGS7BP	BPESC1	0.578447056563473	0.000272880083727781	postive
RIPPLY1	BPESC1	0.756824432430576	1.43635978330255e-07	postive
RIT2	BPESC1	0.671394832346999	1.00995773924129e-05	postive
RNASE11	BPESC1	0.606276329775787	0.000113268686489915	postive
RNF113B	BPESC1	0.64802326752012	2.56683129024361e-05	postive
RNF115	BPESC1	0.733425197280599	5.39363935302705e-07	postive
RNF133	BPESC1	0.613446710443561	8.90971000992767e-05	postive
RNF175	BPESC1	0.740385001930438	3.6924078397915e-07	postive
RPTN	BPESC1	0.564888289565708	0.000407256205602675	postive
RXFP3	BPESC1	-0.536262064849811	0.000898284187972871	negative
SASH3	BPESC1	0.558600785068358	0.000487519147156221	postive
SCML4	BPESC1	0.680166508091584	6.96474991622805e-06	postive
SCNN1D	BPESC1	0.754188958986058	1.67929117624013e-07	postive
SCNN1G	BPESC1	0.647280599537991	2.64065432875486e-05	postive
SEC61A2	BPESC1	0.553053371720567	0.000569696951839812	postive
SEMA6D	BPESC1	0.582299572838689	0.000242751588717958	postive
SEMG2	BPESC1	0.660111457860382	1.60040619515989e-05	postive
SERPINB12	BPESC1	0.634639445406613	4.23046237082878e-05	postive
SERPINB13	BPESC1	0.830926660737329	6.4823976537723e-10	postive
SGCZ	BPESC1	0.794038903340575	1.25379582441847e-08	postive
SH2D4B	BPESC1	0.852040912612811	8.47098352737228e-11	postive
SHC3	BPESC1	0.622363546578326	6.55594457533723e-05	postive
SHCBP1L	BPESC1	0.558302369872179	0.000491655711870149	postive
SHISA3	BPESC1	0.72062272181279	1.05148844097728e-06	postive
SHROOM4	BPESC1	0.574298150116968	0.000309021103000097	postive
SI	BPESC1	0.773723206503778	5.02354285985037e-08	postive
SIAH3	BPESC1	0.535254095509979	0.000922489144080971	postive
SIX3	BPESC1	-0.556728434947737	0.000513993564866038	negative
SLC13A1	BPESC1	0.595866852880156	0.000158876488468265	postive
SLC15A1	BPESC1	0.779407678373946	3.45715179521944e-08	postive
SLC16A12	BPESC1	0.611995605414467	9.35760344527784e-05	postive
SLC22A11	BPESC1	0.676956919158181	7.99076171360265e-06	postive
SLC22A16	BPESC1	0.720026882160277	1.08371008039177e-06	postive
SLC22A2	BPESC1	0.749555637381847	2.19997082899608e-07	postive
SLC22A24	BPESC1	0.602806232621883	0.000126959302161666	postive
SLC22A25	BPESC1	0.80743553811026	4.60178041386452e-09	postive
SLC25A31	BPESC1	0.674184343216232	8.98584865541203e-06	postive
SLC35G3	BPESC1	0.672194310585218	9.7681995996437e-06	postive
SLC36A2	BPESC1	0.667409537889151	1.19091521436275e-05	postive
SLC5A6	BPESC1	0.718620070016962	1.16340852461575e-06	postive
SLC5A7	BPESC1	0.689138729505801	4.69990794522591e-06	postive
SLC6A3	BPESC1	0.830572655184569	6.69127384290743e-10	postive
SLC6A7	BPESC1	0.675166185478969	8.62125306022969e-06	postive
SMG6	BPESC1	0.746629972329803	2.60130050685635e-07	postive
SMR3B	BPESC1	0.70901118488606	1.86827152810009e-06	postive
SNX18	BPESC1	0.613770287569553	8.81250565327818e-05	postive
SNX31	BPESC1	0.576789426159581	0.000286840103648233	postive
SOS1	BPESC1	0.539740064528422	0.00081901522352357	postive
SOX15	BPESC1	0.806091865860091	5.10609404351911e-09	postive
SP140L	BPESC1	0.592207097134942	0.000178455781221751	postive
SP4	BPESC1	0.670633536826711	1.0424599165687e-05	postive
SPACA7	BPESC1	0.845614078891077	1.62462811370437e-10	postive
SPATA19	BPESC1	0.814425032918336	2.64367714263063e-09	postive
SPO11	BPESC1	0.628557528335751	5.268146853599e-05	postive
SPRR2D	BPESC1	0.558544626838031	0.000488295229372967	postive
SPTBN5	BPESC1	0.602425460855287	0.00012854855792435	postive
SPZ1	BPESC1	0.586433315753169	0.000213762677898686	postive
SRSF2	BPESC1	-0.536970075834006	0.000881619395411185	negative
SRY	BPESC1	0.559720874191914	0.000472267230833223	postive
SSTR4	BPESC1	0.705830362280819	2.17646132209807e-06	postive
STAP1	BPESC1	0.570354782406538	0.000347268246247787	postive
STATH	BPESC1	0.65330667960391	2.09331024916609e-05	postive
STBD1	BPESC1	0.640070483206115	3.46399092547897e-05	postive
STC1	BPESC1	0.776525710481297	4.18393751815612e-08	postive
STK32B	BPESC1	0.632557710657171	4.56273644225952e-05	postive
SULT1E1	BPESC1	0.672473981220499	9.65463397277667e-06	postive
SYT14	BPESC1	0.726493979553753	7.77743033403618e-07	postive
SYT16	BPESC1	0.576760168090676	0.000287092127451293	postive
TAAR6	BPESC1	0.755830181428476	1.52392735376408e-07	postive
TACR3	BPESC1	0.847038202243756	1.40993160425992e-10	postive
TAL1	BPESC1	0.674544557376315	8.85048898590883e-06	postive
TAS2R20	BPESC1	0.633594501663577	4.39441298544397e-05	postive
TAS2R3	BPESC1	0.595221058300399	0.000162184742385184	postive
TAS2R38	BPESC1	0.673752021744655	9.15079018868269e-06	postive
TAS2R39	BPESC1	-0.546049164301218	0.000690873054055036	negative
TAS2R42	BPESC1	0.82326649529555	1.26741811457899e-09	postive
TAS2R50	BPESC1	0.705603327470636	2.2001435620015e-06	postive
TAS2R8	BPESC1	0.54408258047475	0.000728763974022006	postive
TBR1	BPESC1	0.714071885905138	1.45924618674598e-06	postive
TBX20	BPESC1	0.628950971314847	5.19464367498576e-05	postive
TCF21	BPESC1	0.636239162611072	3.99015793364943e-05	postive
TCL1A	BPESC1	0.642370307408625	3.17914096486186e-05	postive
TECRL	BPESC1	0.808209240105554	4.33272585310082e-09	postive
TECTB	BPESC1	0.760702495111321	1.13722460705043e-07	postive
TEF	BPESC1	-0.604580625511991	0.000119783568667352	negative
TEX13A	BPESC1	0.775589185248674	4.4488981156242e-08	postive
TGIF2LY	BPESC1	0.579501648223631	0.000264317579872553	postive
TGM4	BPESC1	0.610547437931483	9.82468285181202e-05	postive
TH	BPESC1	0.666165818086285	1.25314314533023e-05	postive
TINAG	BPESC1	0.687406200275071	5.07621529702685e-06	postive
TLL1	BPESC1	0.589773176034962	0.000192646616520206	postive
TM4SF19	BPESC1	0.794335936617662	1.22722012143436e-08	postive
TM4SF20	BPESC1	0.678618159937867	7.44369939831806e-06	postive
TMC1	BPESC1	0.641021050873279	3.34356992925325e-05	postive
TMC3	BPESC1	0.590096893869964	0.000190702724857385	postive
TMCO5A	BPESC1	0.621915000208085	6.65939358150442e-05	postive
TMEM150A	BPESC1	0.5324785458329	0.000992142038746319	postive
TMEM156	BPESC1	0.672522902900297	9.63489226265893e-06	postive
TMEM174	BPESC1	0.673881195353202	9.10122095290078e-06	postive
TMEM71	BPESC1	0.649628985647594	2.41357041350951e-05	postive
TMEM74	BPESC1	0.600936251185399	0.000134937139774576	postive
TMEM95	BPESC1	-0.579244179409609	0.000266385589705047	negative
TMPRSS11A	BPESC1	0.624483224980309	6.08640844426275e-05	postive
TMPRSS11F	BPESC1	0.576338803118523	0.000290743675965437	postive
TMPRSS12	BPESC1	0.553719244211846	0.000559223711399572	postive
TMPRSS2	BPESC1	0.59072402709715	0.000186986753169349	postive
TNK1	BPESC1	0.600135725147513	0.000138487804125357	postive
TPD52L3	BPESC1	0.815606024408755	2.40183742575259e-09	postive
TPH2	BPESC1	0.675033428288314	8.66975075555745e-06	postive
TRHDE	BPESC1	0.770314640165045	6.25336944577272e-08	postive
TRIM49	BPESC1	0.727281464760305	7.46478236666227e-07	postive
TRIM60	BPESC1	0.778860438370938	3.58548353139844e-08	postive
TRPC5	BPESC1	0.741133723466461	3.54240487703223e-07	postive
TRPM5	BPESC1	0.68080824357499	6.77460505499345e-06	postive
TSHR	BPESC1	0.653241114333928	2.09866472851999e-05	postive
TSPAN32	BPESC1	0.673385087993857	9.29294070670574e-06	postive
TSSK1B	BPESC1	-0.562052325922081	0.000441873551558529	negative
TSSK2	BPESC1	0.578958908699643	0.000268693771974337	postive
TXNL1	BPESC1	0.619088145223207	7.3459200346153e-05	postive
UBE2U	BPESC1	0.794713260581485	1.19421162236736e-08	postive
UBQLN3	BPESC1	0.565236392561191	0.000403177939301959	postive
UNC13D	BPESC1	0.57899101062323	0.000268433140049694	postive
UNG	BPESC1	0.652826962062487	2.13277500774699e-05	postive
USH2A	BPESC1	0.557464425425734	0.000503438336807238	postive
USP26	BPESC1	0.791952403871705	1.45600563017538e-08	postive
UTP14C	BPESC1	-0.601500057089142	0.000132485692477573	negative
VGLL2	BPESC1	0.581947075583083	0.000245379046966923	postive
VN1R2	BPESC1	0.829885525396317	7.11463937112696e-10	postive
VNN3	BPESC1	0.819256430859245	1.77774326124473e-09	postive
VWA5B1	BPESC1	0.817703351505574	2.02217269471926e-09	postive
VWC2	BPESC1	0.724268038590649	8.72725968938284e-07	postive
VWC2L	BPESC1	0.596586007498251	0.000155263734251565	postive
WBP2NL	BPESC1	0.764913849331791	8.78111661397846e-08	postive
WDR19	BPESC1	0.712815509953565	1.55231761769422e-06	postive
WDR76	BPESC1	0.648204553791613	2.54909725790913e-05	postive
WFDC10A	BPESC1	0.637457807159732	3.81545343346918e-05	postive
WWC2	BPESC1	0.684400333465633	5.79484185296015e-06	postive
XKR5	BPESC1	0.595563612659277	0.000160422306412086	postive
ZBTB12	BPESC1	0.679694230422605	7.10777576390158e-06	postive
ZDHHC15	BPESC1	0.564618331988811	0.000410444179155212	postive
ZFP41	BPESC1	0.696888840987193	3.30846309317153e-06	postive
ZIM3	BPESC1	0.720576614938888	1.05395009965311e-06	postive
ZNF100	BPESC1	0.644468665523249	2.93792127300924e-05	postive
ZNF221	BPESC1	0.703022512359047	2.48641936226518e-06	postive
ZNF224	BPESC1	0.66242777234547	1.45837575931552e-05	postive
ZNF253	BPESC1	0.590660593836982	0.000187359645825642	postive
ZNF317	BPESC1	-0.641501185969111	3.28419608949347e-05	negative
ZNF33B	BPESC1	0.603966760459299	0.000122223755106777	postive
ZNF354C	BPESC1	0.783970986797276	2.54075893496786e-08	postive
ZNF414	BPESC1	0.592604465361606	0.000176230064633886	postive
ZNF454	BPESC1	0.777008830696455	4.05302014037709e-08	postive
ZNF804B	BPESC1	0.68249126289495	6.29817438628225e-06	postive
ZNF844	BPESC1	0.688822050842144	4.766730151282e-06	postive
ZSCAN1	BPESC1	0.601135768370793	0.000134065016947438	postive
ZSCAN4	BPESC1	0.610117985550595	9.96716923429152e-05	postive
ZSWIM2	BPESC1	0.840752861893032	2.60808971772747e-10	postive
ADIPOQ	C11orf40	0.536449305986945	0.000893850164337996	postive
DAP	C11orf40	0.533761190135108	0.000959397374431401	postive
GTF2E1	C11orf40	0.583717269976388	0.000232436390430858	postive
KRTAP5-9	C11orf40	0.63663250307384	3.93299432871665e-05	postive
NKX6-1	C11orf40	0.560931939178149	0.000456255063134926	postive
PRPF31	C11orf40	0.591935007155951	0.000179994286394682	postive
SPZ1	C11orf40	-0.544966200727879	0.00071151717632145	negative
AADACL2	C15orf32	0.658084118641618	1.73489883382424e-05	postive
AKIRIN2	C15orf32	0.539422686295844	0.000825983031532291	postive
C16orf82	C15orf32	0.64527010018653	2.85025340913183e-05	postive
CLRN1	C15orf32	0.538058126497882	0.000856541593734009	postive
GBP7	C15orf32	0.580806798673833	0.000254053468378824	postive
MAD2L1BP	C15orf32	0.59387774559024	0.000169264764857876	postive
MRPS18A	C15orf32	0.596320536837407	0.000156588687397536	postive
POLR1C	C15orf32	0.538002368753694	0.00085781122648702	postive
TEX28	C15orf32	0.57580085669608	0.000295465733884577	postive
TSGA13	C15orf32	0.539644713236156	0.000821103110231015	postive
ULBP3	C15orf32	0.548853612085621	0.000639857621368048	postive
ADAMTS13	C15orf56	-0.532368561486875	0.00099499519653465	negative
CATSPER4	C15orf56	0.680629365218161	6.82712523774177e-06	postive
CCKAR	C15orf56	0.618532422259785	7.48815162295891e-05	postive
CLEC1A	C15orf56	0.584284959283989	0.00022841699665963	postive
CRP	C15orf56	0.56813223776129	0.000370635326455773	postive
EPYC	C15orf56	0.642057289802055	3.21662133811949e-05	postive
GAPDHS	C15orf56	0.604378643988218	0.000120581594688827	postive
GYS2	C15orf56	0.545675662903907	0.000697932235386559	postive
IFNA2	C15orf56	0.612270789686332	9.27114112669071e-05	postive
KERA	C15orf56	0.573074097702597	0.00032046994505307	postive
KSR2	C15orf56	-0.547041864677463	0.000672417423698652	negative
LHX9	C15orf56	0.565859594129614	0.000395967412303868	postive
MAGEB4	C15orf56	0.561346716555539	0.000450883096419174	postive
MPP3	C15orf56	-0.543593173739908	0.000738474743620572	negative
NPAS4	C15orf56	0.586218562237721	0.000215188726595165	postive
OR2T5	C15orf56	-0.540913792757622	0.000793696169321018	negative
PCDH11Y	C15orf56	0.541378711096608	0.000783860200851615	postive
POC1B	C15orf56	0.570695667327492	0.00034380290173708	postive
RGS13	C15orf56	0.762459437708684	1.0215865658575e-07	postive
SCN10A	C15orf56	0.732737884635585	5.59577521533394e-07	postive
SPAM1	C15orf56	0.689750890193546	4.57315256604311e-06	postive
ANKRD45	C17orf77	-0.532934647372624	0.000980386970263992	negative
CD226	C17orf77	0.615749349930432	8.23847109206567e-05	postive
GKN1	C17orf77	-0.541451600173761	0.000782327951584767	negative
GNGT1	C17orf77	-0.53715610142811	0.000877286385140919	negative
KRT25	C17orf77	-0.535496447031719	0.000916617428229783	negative
KRTAP1-3	C17orf77	-0.554778261325953	0.000542918586217924	negative
MS4A1	C17orf77	-0.583231236798916	0.000235927756957306	negative
OR13C4	C17orf77	0.540754850266329	0.000797083758746218	postive
OR51A7	C17orf77	-0.557934667021354	0.000496795595219883	negative
PCDHB6	C17orf77	0.565151714497827	0.000404166640843195	postive
POTEG	C17orf77	-0.573928991025412	0.000312434882059438	negative
PRAMEF1	C17orf77	-0.572003898695663	0.000330788107187737	negative
PTH2	C17orf77	-0.532207850545953	0.000999177294224285	negative
SCNN1D	C17orf77	-0.546573248513653	0.000681074481792216	negative
SLC22A24	C17orf77	-0.538340891232815	0.000850128423543349	negative
SMARCA2	C17orf77	-0.536491401975813	0.000892855962607149	negative
TRIM49	C17orf77	-0.536194588731172	0.000899886833090215	negative
TSPAN32	C17orf77	-0.582313629631066	0.000242647334998628	negative
VAPA	C17orf77	0.598912230793529	0.000144076650209655	postive
ACBD7	C1orf229	0.649482170292128	2.42723083018317e-05	postive
ADAM33	C1orf229	0.680797971556392	6.7776110165837e-06	postive
ADAT3	C1orf229	0.559694823447887	0.000472617081481116	postive
ALOXE3	C1orf229	0.564408172089938	0.000412941346667942	postive
ALPP	C1orf229	0.571483383252848	0.000335912822547395	postive
AMN	C1orf229	0.747830804692114	2.4290667897487e-07	postive
ANGPT4	C1orf229	0.654609817815296	1.98942485736299e-05	postive
ANKK1	C1orf229	0.586525640417506	0.000213152208473204	postive
ANKRD33	C1orf229	0.621962031362775	6.64847807627397e-05	postive
ANKRD53	C1orf229	0.558042974361042	0.000495276699057187	postive
AQP8	C1orf229	0.570628091669821	0.000344487398099569	postive
ASB16	C1orf229	0.627357547400074	5.49816237920833e-05	postive
ATN1	C1orf229	0.713419588509462	1.50691031610048e-06	postive
BOLA1	C1orf229	-0.620976207630171	6.88068596404633e-05	negative
C16orf78	C1orf229	0.550471413444609	0.000611972473161589	postive
C1orf158	C1orf229	0.911236793630013	2.91604520609204e-14	postive
C20orf144	C1orf229	0.703741417653647	2.40343550844266e-06	postive
C2CD4A	C1orf229	0.53929425221455	0.000828817568471422	postive
C3orf38	C1orf229	-0.546543483683529	0.000681627666692083	negative
C7orf25	C1orf229	-0.597641407271252	0.000150095131559311	negative
CACNA1A	C1orf229	0.548726154058859	0.000642101660410788	postive
CAMK2N2	C1orf229	0.615550158728562	8.29468335835175e-05	postive
CCDC120	C1orf229	0.684129489614546	5.86394433977842e-06	postive
CCIN	C1orf229	0.578848387137767	0.000269592813480237	postive
CCL24	C1orf229	0.636524072132582	3.94867806462776e-05	postive
CD300LB	C1orf229	0.624345545676073	6.11595901907521e-05	postive
CD4	C1orf229	0.610160533318681	9.95297000253345e-05	postive
CD46	C1orf229	-0.571309994716173	0.000337635560185271	negative
CD79A	C1orf229	0.781517234994128	3.00108766816389e-08	postive
CDK5R1	C1orf229	0.545510254442833	0.000701078811405896	postive
CGB1	C1orf229	0.627002314695874	5.56797160146944e-05	postive
CGB2	C1orf229	0.662516928153826	1.45314522654596e-05	postive
CHMP2B	C1orf229	-0.570438556742686	0.000346413746234284	negative
CHRNA4	C1orf229	0.813161119903841	2.9273501904673e-09	postive
COIL	C1orf229	-0.561799386160267	0.000445084621206961	negative
CPA5	C1orf229	0.566289635351099	0.000391058945987852	postive
CRHR1	C1orf229	0.573931646628114	0.000312410204876488	postive
CSH1	C1orf229	0.573099977786887	0.000320224021245976	postive
CSHL1	C1orf229	0.582690713435658	0.000239865545370618	postive
CTRB2	C1orf229	0.729218169539936	6.74426124197942e-07	postive
CWC25	C1orf229	-0.536385819009462	0.000895351417004221	negative
CYB561D1	C1orf229	0.770728562382753	6.09047619946784e-08	postive
CYP4A11	C1orf229	0.62737592243921	5.49457295263113e-05	postive
DAB1	C1orf229	0.616206770053764	8.11068191750159e-05	postive
DAP3	C1orf229	-0.631329478032093	4.76966309852899e-05	negative
DCAF4L2	C1orf229	0.566255343250967	0.000391448356802131	postive
DGKQ	C1orf229	0.733514467301283	5.3678829853616e-07	postive
DMWD	C1orf229	0.730641143848551	6.25615402427945e-07	postive
DPEP3	C1orf229	0.570963524645236	0.000341101596003314	postive
DRD2	C1orf229	0.557359602145927	0.000504929804915486	postive
EMILIN3	C1orf229	0.562377235354827	0.000437779066458506	postive
ERLEC1	C1orf229	-0.631004289695344	4.82584971571189e-05	negative
ERN2	C1orf229	0.706859186177657	2.07203702344973e-06	postive
ERVV-2	C1orf229	0.768238759654246	7.13260365194118e-08	postive
ERVW-1	C1orf229	0.550912790526064	0.000604554277984233	postive
EXOC3L2	C1orf229	0.70622211098057	2.13614498455886e-06	postive
FAM131C	C1orf229	0.753100153397064	1.79026557596852e-07	postive
FAM47C	C1orf229	0.855570211371719	5.84675565698768e-11	postive
FBXL19	C1orf229	0.561840265840264	0.00044456425200863	postive
FGF3	C1orf229	0.586323836129136	0.000214488606189959	postive
FIBCD1	C1orf229	0.595844274094482	0.000158991125756768	postive
FMO1	C1orf229	0.533896996159259	0.000955986861183723	postive
FOXB1	C1orf229	0.862333309666779	2.79356246388718e-11	postive
FOXC2	C1orf229	0.782757172919487	2.75963506786913e-08	postive
FOXS1	C1orf229	0.737060783597046	4.43150298924237e-07	postive
FRMD1	C1orf229	0.636871679370569	3.89859816580553e-05	postive
GABRA3	C1orf229	0.604242155444694	0.00012112355929117	postive
GBP6	C1orf229	0.63361604456574	4.39097578442101e-05	postive
GFM1	C1orf229	-0.564306291840902	0.000414156769520515	negative
GFRA4	C1orf229	0.781557692146897	2.9929111618271e-08	postive
GH1	C1orf229	0.538839175069082	0.000838930446085169	postive
GHSR	C1orf229	0.625964121907604	5.77660244818964e-05	postive
GIPR	C1orf229	0.533259281742023	0.000972095228500531	postive
GJD3	C1orf229	0.649031549004837	2.46959747902995e-05	postive
GLIS2	C1orf229	0.721554735987319	1.00284376023555e-06	postive
GNG13	C1orf229	0.597220063026984	0.000152139776554497	postive
GNRH2	C1orf229	0.578721910682799	0.000270624936011897	postive
GPR17	C1orf229	0.543708724252228	0.000736171730636088	postive
GPR25	C1orf229	0.679894224280315	7.04688571484007e-06	postive
GPR32	C1orf229	0.574404718878319	0.000308041823253543	postive
HCRT	C1orf229	0.72556651162273	8.16103080766279e-07	postive
HMX2	C1orf229	0.547383888548523	0.000666160669963315	postive
HNRNPCL1	C1orf229	-0.603117486066686	0.000125673329047483	negative
IBA57	C1orf229	0.611167794202721	9.62209080349513e-05	postive
IFNA4	C1orf229	0.592122766965033	0.000178931353033816	postive
IGLON5	C1orf229	0.532324772186351	0.000996133169411239	postive
ILDR1	C1orf229	0.613729874966983	8.82459343978672e-05	postive
INHBC	C1orf229	0.603115653953037	0.000125680864249955	postive
INO80D	C1orf229	0.627095555166906	5.54957128638763e-05	postive
IPPK	C1orf229	-0.533299421828742	0.000971074290361857	negative
IRF2	C1orf229	-0.553758622148751	0.000558609737885811	negative
IRGC	C1orf229	0.585264681172144	0.000221626273406948	postive
KCNK4	C1orf229	0.65046778625233	2.33685148478624e-05	postive
KCNK7	C1orf229	0.623982614723807	6.19447723740684e-05	postive
KCNQ3	C1orf229	-0.546557269773936	0.000681371400181866	negative
KCNV2	C1orf229	0.547313894581964	0.000667436878185916	postive
KIF5B	C1orf229	-0.586733552701772	0.000211783157827116	negative
KIR3DL1	C1orf229	0.564149005510377	0.000416039433980414	postive
KISS1R	C1orf229	0.683779694253036	5.95430148017504e-06	postive
KLK14	C1orf229	0.650990579095531	2.29016045367822e-05	postive
KLK9	C1orf229	0.611677222217799	9.45854343227066e-05	postive
KRT3	C1orf229	0.726099095332793	7.93868646103012e-07	postive
KRT71	C1orf229	0.560208272820838	0.000465763973144031	postive
KRT85	C1orf229	0.554320663048435	0.000549911470214998	postive
KRTAP2-1	C1orf229	0.567693661693215	0.000375408409143447	postive
KRTAP4-11	C1orf229	0.647632688360105	2.60541941265142e-05	postive
KRTAP4-12	C1orf229	0.558656076747597	0.000486756111314198	postive
LCE1C	C1orf229	0.760971935752496	1.11874159114087e-07	postive
LCE2A	C1orf229	0.604370979603226	0.000120611970379197	postive
LCE2D	C1orf229	0.648446875207645	2.52556590490646e-05	postive
LCE3E	C1orf229	0.677254752587731	7.89006776909212e-06	postive
LENG8	C1orf229	0.696398750247865	3.38381876063488e-06	postive
LHB	C1orf229	0.604374111586696	0.000120599556790352	postive
LIMS2	C1orf229	0.545513633962993	0.000701014397077063	postive
LTB4R2	C1orf229	0.581108680575764	0.000251730700140716	postive
MAMSTR	C1orf229	0.712748773686028	1.55741010259443e-06	postive
MEFV	C1orf229	0.584281427820277	0.000228441807034938	postive
MFRP	C1orf229	0.584194840110998	0.000229050885243681	postive
MLNR	C1orf229	-0.554308437540664	0.000550099388284958	negative
MRGPRE	C1orf229	0.536834926957337	0.00088477920334525	postive
MUC6	C1orf229	0.570140854563654	0.000349458844337002	postive
MYH14	C1orf229	0.74314791030347	3.16621853630296e-07	postive
MYNN	C1orf229	-0.534191675571547	0.000948623318713953	negative
MYOD1	C1orf229	0.834188017681339	4.82328352948522e-10	postive
MYOG	C1orf229	0.590574338986294	0.000187867763640409	postive
MYOZ3	C1orf229	0.634681935150968	4.22391429155142e-05	postive
NCR1	C1orf229	0.535405326160879	0.000918821230442077	postive
NEUROG1	C1orf229	0.802475175338254	6.72883722655982e-09	postive
NIPA1	C1orf229	-0.603037417958205	0.000126003015698337	negative
NKX1-2	C1orf229	0.839546508292103	2.92603722709115e-10	postive
NKX6-3	C1orf229	0.583904086900038	0.000231106750180268	postive
NPBWR1	C1orf229	0.787414387184511	2.00401428877563e-08	postive
NTN3	C1orf229	0.615975877348516	8.17496145534144e-05	postive
NYX	C1orf229	0.717946571262643	1.20343281462361e-06	postive
ODF3L2	C1orf229	0.685537174433672	5.51281155580147e-06	postive
OPN1MW	C1orf229	0.54315676177007	0.000747230403290526	postive
OR10H2	C1orf229	0.695492108535392	3.52736751835899e-06	postive
OR11A1	C1orf229	0.595698960653287	0.000159730689074313	postive
OR4D2	C1orf229	0.534197756419968	0.000948471897246513	postive
OR5H1	C1orf229	0.555876199167513	0.000526461131595384	postive
OR6M1	C1orf229	0.537771396826295	0.000863088307445572	postive
OR7D2	C1orf229	0.576386121206227	0.000290331561659118	postive
OR8J1	C1orf229	0.593633729095493	0.000170580192303242	postive
OXER1	C1orf229	0.554425793456644	0.000548297862749425	postive
OXT	C1orf229	0.649936708736988	2.38516413000652e-05	postive
P2RX1	C1orf229	0.591531987410897	0.000182294956866224	postive
P2RX2	C1orf229	0.641793160955554	3.24855837591234e-05	postive
P2RX3	C1orf229	0.644883539294395	2.8922386496289e-05	postive
PAX4	C1orf229	0.620727334610779	6.94045102292004e-05	postive
PCIF1	C1orf229	0.564253297611727	0.000414790244009532	postive
PDCL3	C1orf229	-0.544556611686712	0.000719466217665251	negative
PEX13	C1orf229	-0.622493084736163	6.52633979149916e-05	negative
PGA3	C1orf229	0.549959952880513	0.000620669418744278	postive
PI4KB	C1orf229	-0.590165774716541	0.000190291375786482	negative
PLA2G4D	C1orf229	0.53422330727917	0.000947835878940979	postive
POLR2J2	C1orf229	0.613379581296359	8.92999641310967e-05	postive
PPP4C	C1orf229	-0.610342076127842	9.89258889642987e-05	negative
PPP4R2	C1orf229	-0.575382450097997	0.000299185670362878	negative
PRB3	C1orf229	0.674382590680738	8.91112084062988e-06	postive
PRB4	C1orf229	0.637836217897332	3.76262938832157e-05	postive
PRLHR	C1orf229	0.544639146455319	0.000717858140402471	postive
PRM3	C1orf229	0.596844210110879	0.000153984708107592	postive
PROP1	C1orf229	0.676819011647102	8.03778165983718e-06	postive
PRSS56	C1orf229	0.829810281987219	7.16247892650978e-10	postive
PSMD4	C1orf229	-0.589547096178914	0.000194014703877501	negative
PSPN	C1orf229	0.653423934767354	2.08376531776966e-05	postive
PTMS	C1orf229	0.78123425803689	3.05885717796671e-08	postive
RAB5A	C1orf229	-0.560386562717012	0.000463405050135753	negative
RAX2	C1orf229	0.648808399825063	2.4908246463485e-05	postive
RXFP3	C1orf229	0.59836085296907	0.000146660802055654	postive
SBK2	C1orf229	0.782357651500111	2.83540099271513e-08	postive
SCRT1	C1orf229	0.586079869930162	0.000216114215655517	postive
SEC22A	C1orf229	-0.611183169281938	9.61711778198706e-05	negative
SF3A2	C1orf229	0.84495078492743	1.7346587799648e-10	postive
SH2B2	C1orf229	0.688531461009905	4.82880851112637e-06	postive
SHISA7	C1orf229	0.571717767377378	0.000333596507570465	postive
SLC22A10	C1orf229	0.615461570145646	8.31979402907303e-05	postive
SLC22A12	C1orf229	0.625487116570838	5.87480285683122e-05	postive
SLC34A3	C1orf229	0.886525831632895	1.388730209567e-12	postive
SLC35E4	C1orf229	0.572628920799476	0.000324726659537158	postive
SLC35G5	C1orf229	0.639738720883846	3.50693437218803e-05	postive
SLC5A2	C1orf229	0.595586523559102	0.000160305045140869	postive
SLC6A18	C1orf229	0.578977388776722	0.000268543706707861	postive
SMR3A	C1orf229	0.565328235057984	0.000402108020047384	postive
SOX18	C1orf229	0.660036730807036	1.60519048304377e-05	postive
SPACA3	C1orf229	0.604976771987075	0.000118232162291101	postive
SPDYE2	C1orf229	0.588427136903461	0.000200921080358505	postive
SPDYE3	C1orf229	0.544238685298705	0.000725690421091497	postive
SPINK7	C1orf229	0.661482227480693	1.51491011020364e-05	postive
SPRR2E	C1orf229	0.719430906983483	1.11684164490325e-06	postive
SPSB4	C1orf229	0.808994819553534	4.07450184962444e-09	postive
SRSF9	C1orf229	-0.534870696129109	0.000931846022981578	negative
STAC3	C1orf229	0.565854933429676	0.000396020908336997	postive
SUCLG2	C1orf229	-0.576321082912467	0.000290898143455722	negative
SYT2	C1orf229	0.540390832605673	0.000804890396217715	postive
TAC1	C1orf229	-0.543120539270256	0.000747961241168828	negative
TACR2	C1orf229	0.579700026612788	0.000262733982396696	postive
TAS2R31	C1orf229	0.605596895245545	0.000115839828377157	postive
TBKBP1	C1orf229	0.754593623130192	1.63968630648391e-07	postive
TBX6	C1orf229	0.57979018251857	0.00026201709888898	postive
TCF23	C1orf229	0.56763964187118	0.000376000084765552	postive
TDRD10	C1orf229	0.564580362598384	0.000410894342865941	postive
TFDP3	C1orf229	-0.538172657380735	0.000853938873601773	negative
TGM7	C1orf229	0.590946704898651	0.00018568299656361	postive
THEM5	C1orf229	0.636757478623267	3.91498740968318e-05	postive
TIAM1	C1orf229	0.647788809871506	2.58993244716352e-05	postive
TIMMDC1	C1orf229	-0.565886829195442	0.000395654933798634	negative
TMEM114	C1orf229	0.594791431768026	0.000164419688089114	postive
TMEM175	C1orf229	0.823529216816148	1.23926605505919e-09	postive
TMEM201	C1orf229	0.709435740221922	1.83030510391387e-06	postive
TNNI1	C1orf229	0.537857086191495	0.000861127200857211	postive
TNXB	C1orf229	0.598122017712777	0.000147793002512953	postive
TOMM20L	C1orf229	0.68406574221307	5.88031750207041e-06	postive
TPM3	C1orf229	-0.604265844284972	0.000121029339738594	negative
TREML1	C1orf229	0.558394005121511	0.000490382179196799	postive
TRPM6	C1orf229	-0.542267053704176	0.000765365512292201	negative
TTBK1	C1orf229	0.664411523738016	1.34594511203334e-05	postive
UCN2	C1orf229	0.811270954241625	3.40454278167198e-09	postive
UCP3	C1orf229	0.604357987812054	0.000120663475483868	postive
UNC50	C1orf229	-0.564306182276279	0.000414158078329095	negative
UTF1	C1orf229	0.798489308465678	9.06191296335951e-09	postive
VPREB1	C1orf229	0.607772482098888	0.000107786804379524	postive
VPS45	C1orf229	-0.560076200271776	0.000467518278652627	negative
VWA5B2	C1orf229	0.793563242924401	1.2974636521809e-08	postive
WDTC1	C1orf229	0.667898755071323	1.16721750080685e-05	postive
XCR1	C1orf229	0.656173995964829	1.87091583339561e-05	postive
ZAN	C1orf229	0.611749077793742	9.43567719681436e-05	postive
ZBTB34	C1orf229	0.602041336283833	0.000130169882628603	postive
ZDHHC8	C1orf229	0.755974328498035	1.51093440042526e-07	postive
ZNF713	C1orf229	0.61372632958507	8.82565460820769e-05	postive
ZNF843	C1orf229	0.72420666986658	8.75489142725046e-07	postive
ACBD4	C22orf24	0.677612797788521	7.77054664307939e-06	postive
ACE	C22orf24	0.561656973745504	0.000446901662889463	postive
ADAM29	C22orf24	0.755101868028626	1.59116184526025e-07	postive
ADAM30	C22orf24	0.583869885291259	0.000231349665023542	postive
ADAMTS15	C22orf24	0.703865034450773	2.38942410422018e-06	postive
ADAMTS20	C22orf24	0.623381139643425	6.32660681797842e-05	postive
ADCY10	C22orf24	0.670476029064097	1.04930203928211e-05	postive
ADH7	C22orf24	0.615120453516283	8.4171248228906e-05	postive
ADM2	C22orf24	0.541960356250069	0.000771706633710137	postive
AFM	C22orf24	0.561115604617255	0.00045386934981938	postive
AGTR2	C22orf24	0.536971125484576	0.000881594893433462	postive
AIPL1	C22orf24	0.551009855583183	0.000602933649205366	postive
ANGPTL3	C22orf24	0.553843848696857	0.000557282949398315	postive
ANKLE1	C22orf24	0.67184152171471	9.91318906590081e-06	postive
ANKRD29	C22orf24	0.599893398352358	0.000139579031996505	postive
ANKRD45	C22orf24	0.597149928486949	0.000152482530752857	postive
ANO7	C22orf24	0.692362649527244	4.06662990741765e-06	postive
AQP10	C22orf24	0.718308278980339	1.1817833720473e-06	postive
ARHGAP20	C22orf24	0.65739586679236	1.78283789629384e-05	postive
ART3	C22orf24	0.570009954505837	0.00035080531183092	postive
ASB11	C22orf24	0.701108251815951	2.72031675320355e-06	postive
ATF7IP2	C22orf24	0.628591864591539	5.26169495533653e-05	postive
ATP10A	C22orf24	0.546522169370502	0.000682024041656826	postive
ATP1B4	C22orf24	0.704413606130474	2.32814231827619e-06	postive
ATP2B3	C22orf24	0.579837166879989	0.000261644191131463	postive
ATPAF1	C22orf24	0.637211801937465	3.85015308408168e-05	postive
ATXN3L	C22orf24	0.706603503205843	2.09755162961727e-06	postive
B3GAT2	C22orf24	0.713949824974644	1.46805896635121e-06	postive
B3GNT4	C22orf24	0.675779670530811	8.40033061597482e-06	postive
B4GALT6	C22orf24	0.746922351084409	2.558361136476e-07	postive
BAAT	C22orf24	0.681280173732503	6.63780383027015e-06	postive
BNC1	C22orf24	0.564223272134824	0.00041514954058674	postive
BNIP1	C22orf24	0.702040222841708	2.6040414010439e-06	postive
BOLL	C22orf24	0.556356492175227	0.00051940218650762	postive
BPIFB4	C22orf24	0.802439321704686	6.74708016570016e-09	postive
BPIFC	C22orf24	0.781082040304862	3.09035521597221e-08	postive
BPY2B	C22orf24	0.58798638887747	0.00020369879149037	postive
C10orf53	C22orf24	0.669489027677448	1.09311523679732e-05	postive
C10orf67	C22orf24	0.570827106674593	0.000342474979942333	postive
C10orf88	C22orf24	0.584941132443538	0.000223848637063057	postive
C12orf42	C22orf24	0.569014533943802	0.000361196616812763	postive
C17orf67	C22orf24	0.584788072151277	0.000224906891721835	postive
C1orf94	C22orf24	0.692329858675188	4.07265838081019e-06	postive
C2orf50	C22orf24	0.620617866461581	6.96688683726196e-05	postive
C4orf36	C22orf24	0.586711009133287	0.000211931220379428	postive
C4orf46	C22orf24	0.657988947283295	1.74145738470053e-05	postive
C5AR1	C22orf24	-0.537516838460638	0.000868937484089849	negative
C5orf22	C22orf24	0.550771765152653	0.000606915765530398	postive
C7orf57	C22orf24	0.684191668537498	5.848014070322e-06	postive
CABS1	C22orf24	0.543151194687726	0.000747342685584841	postive
CAMSAP1	C22orf24	0.558773863517882	0.000485134168477602	postive
CCDC60	C22orf24	0.577298960362541	0.000282482617974957	postive
CCDC62	C22orf24	0.750585958568106	2.0727802049774e-07	postive
CCL25	C22orf24	0.710115878052041	1.7709514750816e-06	postive
CD209	C22orf24	0.549807209225148	0.000623287853615187	postive
CDH8	C22orf24	0.53478007920409	0.000934069737252276	postive
CDHR5	C22orf24	0.557010594922176	0.000509923951242175	postive
CDKL4	C22orf24	0.700110176732803	2.85008429336922e-06	postive
CDKN2B	C22orf24	0.650710289000244	2.31508715830071e-05	postive
CDRT15	C22orf24	0.628486586444218	5.28149969721509e-05	postive
CELF4	C22orf24	0.539248770466843	0.000829823409203659	postive
CELF6	C22orf24	0.604295730403946	0.000120910565159711	postive
CEP97	C22orf24	0.633299875701106	4.44166556825945e-05	postive
CER1	C22orf24	0.701434990180552	2.67902266205768e-06	postive
CFHR2	C22orf24	0.575179246754797	0.000301007325749678	postive
CILP2	C22orf24	0.698673260430001	3.04685632863183e-06	postive
CLEC18A	C22orf24	0.772290202309382	5.51049701627958e-08	postive
CLVS1	C22orf24	0.690374151858954	4.44730934339185e-06	postive
CNBP	C22orf24	0.544204285085378	0.000726366740550957	postive
CNGB1	C22orf24	0.663511051151444	1.39596583043321e-05	postive
CNNM1	C22orf24	0.758390031852206	1.30781513186706e-07	postive
CNPPD1	C22orf24	0.689250863859267	4.67645212129037e-06	postive
COL20A1	C22orf24	0.674854496014932	8.73550956117081e-06	postive
COL22A1	C22orf24	0.543481314729698	0.000740710253805708	postive
CPA2	C22orf24	0.658952102361135	1.6761096832659e-05	postive
CPLX2	C22orf24	0.631281673580181	4.77788562173265e-05	postive
CREG2	C22orf24	0.571156148796426	0.000339170717843666	postive
CRISP3	C22orf24	0.658081357541295	1.73508879357829e-05	postive
CRYBA4	C22orf24	0.708100123735103	1.95218761034883e-06	postive
CRYGD	C22orf24	0.603093413385851	0.000125772368651731	postive
CSH2	C22orf24	0.800460408097137	7.82796542453087e-09	postive
CSMD2	C22orf24	0.578604742281277	0.000271584246543076	postive
CXorf51A	C22orf24	0.757440604295299	1.38444112535384e-07	postive
CXorf58	C22orf24	0.632543214227693	4.56513066982438e-05	postive
CYB5D1	C22orf24	0.679192958228219	7.26250431561215e-06	postive
CYP1A1	C22orf24	0.668182515028412	1.15366936924047e-05	postive
CYP2C19	C22orf24	0.604766600725308	0.000119052981659912	postive
CYP7A1	C22orf24	0.740003335153273	3.77109797867551e-07	postive
CYSLTR2	C22orf24	0.718951821979055	1.1441449716173e-06	postive
DAOA	C22orf24	0.576274057661543	0.000291308418933988	postive
DCDC1	C22orf24	0.734733743895732	5.02721147085996e-07	postive
DCHS2	C22orf24	0.555025956112382	0.000539166411817759	postive
DDX53	C22orf24	0.736650576620623	4.53156339070649e-07	postive
DEFB118	C22orf24	0.557695529391	0.00050016391328401	postive
DEFB125	C22orf24	0.553263341915445	0.000566375783768772	postive
DKKL1	C22orf24	0.753201110938089	1.77969883445517e-07	postive
DLEU7	C22orf24	0.614760518330691	8.52093539226231e-05	postive
DMC1	C22orf24	0.537264429584767	0.000874771823601683	postive
DNAJB7	C22orf24	0.545711653991384	0.000697249233535423	postive
DNAJC3	C22orf24	0.581001322170167	0.000252554563966145	postive
DPEP2	C22orf24	-0.546492235075346	0.000682581064178728	negative
DSC1	C22orf24	0.799103624793377	8.65928674447202e-09	postive
DSG4	C22orf24	0.581510852592122	0.000248665754249724	postive
DSTYK	C22orf24	0.562840971617173	0.000431993550859149	postive
DTHD1	C22orf24	0.575265545727	0.000300232476522708	postive
DTX2	C22orf24	0.714211042271845	1.44925821174473e-06	postive
DZIP1L	C22orf24	0.598468181844567	0.000146154547242551	postive
EBNA1BP2	C22orf24	0.784569822622251	2.43878713040041e-08	postive
ECT2L	C22orf24	0.547317363864417	0.000667373571368343	postive
EDDM3A	C22orf24	0.762852309692988	9.97257247156623e-08	postive
ELAVL1	C22orf24	0.551020883221882	0.00060274977221616	postive
EMD	C22orf24	0.764491063205971	9.01420222874678e-08	postive
EPB41L4B	C22orf24	0.533824992947693	0.000957793751511168	postive
EPS8L3	C22orf24	0.641836646532184	3.2432806829555e-05	postive
EXOC4	C22orf24	0.622089411947968	6.6189951447566e-05	postive
F13B	C22orf24	0.589665306748643	0.000193298289741328	postive
F3	C22orf24	0.602746447575378	0.000127207658090153	postive
FABP2	C22orf24	0.566821565424419	0.000385062517112809	postive
FAM102A	C22orf24	-0.554055681742551	0.000553997285385273	negative
FAM205A	C22orf24	0.609615652098723	0.000101361927621075	postive
FAM83H	C22orf24	0.57334823246945	0.000317873534015926	postive
FAM98B	C22orf24	0.7272986597416	7.45808605217222e-07	postive
FBXL8	C22orf24	0.548537704816192	0.00064543229755551	postive
FCER1G	C22orf24	0.576796144832864	0.000286782258079802	postive
FCRL1	C22orf24	0.594931686883878	0.000163687055469136	postive
FERMT1	C22orf24	0.623682257694272	6.26014410520836e-05	postive
FLG	C22orf24	0.53413485638953	0.000950039225833788	postive
FOXI1	C22orf24	0.555633445802858	0.000530061221632296	postive
FRMD6	C22orf24	0.637462812588647	3.81475034979766e-05	postive
FSCB	C22orf24	0.533873297478977	0.000956581237162129	postive
GABRA4	C22orf24	0.754461971447847	1.65247583577566e-07	postive
GALP	C22orf24	0.620185539974012	7.07217992385601e-05	postive
GFRAL	C22orf24	0.594677607708155	0.000165016415226258	postive
GHRHR	C22orf24	-0.536099358291653	0.000902152976206169	negative
GIPR	C22orf24	-0.554860052626466	0.000541677025293487	negative
GJA10	C22orf24	0.546136901514121	0.000689224019924826	postive
GK2	C22orf24	0.621812708366016	6.68319038949558e-05	postive
GKN1	C22orf24	0.713929777842595	1.46951101507212e-06	postive
GLIPR1L1	C22orf24	0.631525610164387	4.73606132770271e-05	postive
GLP1R	C22orf24	0.54905117721475	0.000636393005566396	postive
GNG3	C22orf24	0.648801470138697	2.49148647428429e-05	postive
GNGT1	C22orf24	0.568453934248015	0.000367168704856282	postive
GNRHR	C22orf24	0.704050328561689	2.3685616491873e-06	postive
GOLGA1	C22orf24	-0.589009811257026	0.000197300961654454	negative
GOLPH3L	C22orf24	0.564423652927934	0.000412756939639689	postive
GPR101	C22orf24	0.707017583521763	2.05637325509944e-06	postive
GRIK1	C22orf24	0.636141908607037	4.00440702114964e-05	postive
GRK1	C22orf24	0.661542409249238	1.51125338628797e-05	postive
GUCY2F	C22orf24	0.714090109733828	1.45793459208915e-06	postive
GYS2	C22orf24	0.571521748884679	0.000335532693326646	postive
H6PD	C22orf24	0.538959373376538	0.000836248815743154	postive
HAND2	C22orf24	0.557841756369702	0.00049810186535896	postive
HDDC2	C22orf24	0.668476580668358	1.13978016541158e-05	postive
HECTD3	C22orf24	0.579659955108326	0.000263053176906636	postive
HHLA1	C22orf24	0.625148748444203	5.94537249218125e-05	postive
HIPK4	C22orf24	0.585801343321845	0.0002179835769303	postive
HNF4A	C22orf24	0.645965430501169	2.77611865337979e-05	postive
HOXD12	C22orf24	0.558831270801115	0.00048434540311029	postive
HOXD9	C22orf24	0.665625565986032	1.28108296124205e-05	postive
HRH4	C22orf24	0.540284302551637	0.00080718776601895	postive
IFNA16	C22orf24	0.5490584112796	0.000636266461025684	postive
IFNA8	C22orf24	0.581859172773188	0.000246038206850087	postive
IFNK	C22orf24	0.612925865771413	9.06820246707768e-05	postive
IFNW1	C22orf24	0.550541489450394	0.000610789347328573	postive
IL17F	C22orf24	0.551249027116364	0.000598956796901753	postive
IL23R	C22orf24	0.755566795226304	1.54793409682324e-07	postive
IL3	C22orf24	0.593447191502021	0.000171591936411437	postive
IL31RA	C22orf24	0.593370718062144	0.000172008265352451	postive
IL9R	C22orf24	0.632122265720984	4.63515129884942e-05	postive
IMPG1	C22orf24	0.791670654335712	1.4855099675169e-08	postive
INSL6	C22orf24	0.602398076137165	0.000128663541083083	postive
IQCF1	C22orf24	0.690969166088102	4.33012523800634e-06	postive
IQCF2	C22orf24	0.576748113059227	0.000287196024831572	postive
IQCF5	C22orf24	0.552078338316552	0.000585346897110061	postive
IRF8	C22orf24	0.668423610067186	1.14227077342439e-05	postive
IRS4	C22orf24	0.546480638726806	0.000682796959293076	postive
JOSD2	C22orf24	-0.601957849793543	0.000130524684127584	negative
KCNG2	C22orf24	0.602901670078364	0.000126563742973603	postive
KCNH7	C22orf24	0.726680940468899	7.7021349697148e-07	postive
KCNK18	C22orf24	0.562709272710244	0.000433629654313529	postive
KCTD16	C22orf24	0.667675116642381	1.17799685502233e-05	postive
KIF3B	C22orf24	0.551126417224027	0.000600992591398446	postive
KIR2DL4	C22orf24	-0.567886529906209	0.00037330269575396	negative
KISS1	C22orf24	0.625357412230127	5.90176402797459e-05	postive
KLF17	C22orf24	0.788391984513777	1.87196247965435e-08	postive
KLHL18	C22orf24	0.628131892746124	5.3487202534748e-05	postive
KLK13	C22orf24	0.544415794226786	0.000722217216625771	postive
KLK2	C22orf24	0.615357893708294	8.34926828998986e-05	postive
KLRF2	C22orf24	0.605149075790629	0.000117563029628761	postive
KRT25	C22orf24	0.614174444007962	8.69243580801387e-05	postive
KRT26	C22orf24	0.571463950974751	0.000336105505278629	postive
KRT37	C22orf24	0.543349569147174	0.000743350877871756	postive
KRT82	C22orf24	0.535746478166796	0.000910594261441757	postive
KRTAP1-3	C22orf24	0.717064830765694	1.25773871721828e-06	postive
KRTAP3-3	C22orf24	0.704440938471557	2.32512689551269e-06	postive
KRTAP4-3	C22orf24	0.54294390803496	0.000751534085325861	postive
KRTAP4-4	C22orf24	0.614702813387648	8.53768510981829e-05	postive
KRTAP4-9	C22orf24	0.53934829352292	0.000827623832005699	postive
KRTAP9-3	C22orf24	0.598525354429768	0.000145885512837736	postive
LCE1B	C22orf24	0.595128423671583	0.000162664317713656	postive
LCN1	C22orf24	0.680379447069563	6.90112443038244e-06	postive
LCT	C22orf24	0.71223493806942	1.59713471300424e-06	postive
LDHAL6A	C22orf24	0.623610116066689	6.27600957970571e-05	postive
LDHAL6B	C22orf24	0.576021891093387	0.000293517288351777	postive
LGSN	C22orf24	0.566279729633692	0.00039117139690647	postive
LHCGR	C22orf24	0.573007741326038	0.000321101261918926	postive
LHX3	C22orf24	0.654582144540309	1.99158144914953e-05	postive
LHX5	C22orf24	0.677846272833458	7.69349936739102e-06	postive
LHX9	C22orf24	0.549545652425755	0.000627794386165343	postive
LILRA5	C22orf24	-0.545980953262187	0.000692157504117393	negative
LMOD3	C22orf24	0.675157851008999	8.62429045707775e-06	postive
LPP	C22orf24	0.565294779845829	0.000402497463587983	postive
LRRC3	C22orf24	0.624527126295001	6.07701287002631e-05	postive
LRRC3C	C22orf24	0.60432355253939	0.000120800087452221	postive
LRRN3	C22orf24	0.666416525166706	1.24036659627629e-05	postive
LRTM1	C22orf24	0.675755768818361	8.40884047875151e-06	postive
LY6H	C22orf24	0.62159754108356	6.73349650350967e-05	postive
MAS1	C22orf24	0.539529345518061	0.000823635582174199	postive
MCHR1	C22orf24	0.64125193785882	3.31489813769125e-05	postive
METTL4	C22orf24	0.596877704812581	0.000153819483786444	postive
MLH3	C22orf24	-0.627592668696417	5.45239248439317e-05	negative
MLLT1	C22orf24	0.647137319268059	2.65511608306717e-05	postive
MMP20	C22orf24	0.533337950789744	0.000970095220332919	postive
MMP24	C22orf24	0.603400279428075	0.00012451509542108	postive
MORN5	C22orf24	0.681832018634665	6.4810317205326e-06	postive
MOV10L1	C22orf24	0.62877498873204	5.22740560529509e-05	postive
MSTN	C22orf24	0.631263813056504	4.78096097392542e-05	postive
MTNR1A	C22orf24	0.553085997294576	0.000569179771124611	postive
MTNR1B	C22orf24	0.537299008905833	0.00087397049478075	postive
MYF5	C22orf24	0.726045678968692	7.96073356400753e-07	postive
MYLK3	C22orf24	0.681546463740117	6.5617280136707e-06	postive
MYO3B	C22orf24	0.737099575451145	4.42214640138151e-07	postive
NALCN	C22orf24	0.596270339874305	0.000156840354996256	postive
NECAB2	C22orf24	0.758817280909069	1.27462362268203e-07	postive
NEIL2	C22orf24	0.629875468685626	5.02555856299515e-05	postive
NHLRC4	C22orf24	0.718802140848673	1.1527999085712e-06	postive
NR1I3	C22orf24	0.685307313455463	5.56880580107262e-06	postive
NTSR1	C22orf24	0.690835293302546	4.35624221676035e-06	postive
OLIG2	C22orf24	0.580058736561396	0.00025989200767859	postive
OPRK1	C22orf24	0.74791747145152	2.41705141314914e-07	postive
OPRM1	C22orf24	0.534754587417864	0.00093469614237062	postive
OR11H12	C22orf24	0.677715328294381	7.73662525760374e-06	postive
OR1E1	C22orf24	0.559416537755609	0.000476368741669188	postive
OR1S2	C22orf24	0.534633493398181	0.000937676832145248	postive
OR2H2	C22orf24	0.637724129713853	3.77820692573701e-05	postive
OR2L13	C22orf24	0.558670821222453	0.000486552814028909	postive
OR2W3	C22orf24	0.692062792580456	4.12206198576071e-06	postive
OR4C46	C22orf24	0.656076461820272	1.87811385847343e-05	postive
OR51A7	C22orf24	0.730354708077776	6.35171979669295e-07	postive
OR51B2	C22orf24	0.547295547959257	0.00066777175239692	postive
OR5L2	C22orf24	0.546523064204516	0.000682007396630925	postive
OR5P3	C22orf24	0.629420093214834	5.108212852832e-05	postive
OR6N1	C22orf24	0.663612422996922	1.39025154768193e-05	postive
OTOGL	C22orf24	0.739130797182034	3.95681365618577e-07	postive
OTUD7B	C22orf24	0.551261598816544	0.000598748404554086	postive
P2RX6	C22orf24	0.675632655360303	8.45279768609046e-06	postive
PAPOLB	C22orf24	0.604152983239245	0.000121478822195173	postive
PAPPA2	C22orf24	0.541326233205915	0.000784965016034099	postive
PATE1	C22orf24	0.590881493003243	0.000186063960234161	postive
PCDH15	C22orf24	0.542901549932292	0.00075239313420958	postive
PCDHGA2	C22orf24	0.546672361115084	0.000679235321239836	postive
PCF11	C22orf24	0.749787615926222	2.17072321448779e-07	postive
PDE5A	C22orf24	0.538220616944866	0.000852851067786514	postive
PDZD9	C22orf24	0.6326757178824	4.54328854891911e-05	postive
PEX11G	C22orf24	0.677333008329635	7.86380276802337e-06	postive
PGGT1B	C22orf24	0.618373528328478	7.52927242264524e-05	postive
PIK3AP1	C22orf24	0.605722335599134	0.000115361222105666	postive
PLIN4	C22orf24	0.708882206290806	1.87994746902243e-06	postive
PNPLA1	C22orf24	0.593280535607243	0.000172500390393975	postive
PODN	C22orf24	0.601792742448417	0.000131228915814221	postive
PPEF2	C22orf24	0.597893669023159	0.000148882815987122	postive
PPP1R12B	C22orf24	0.620829741117712	6.91580242514404e-05	postive
PPP1R14C	C22orf24	0.574515409666491	0.000307027597527242	postive
PRAMEF1	C22orf24	0.579999953160937	0.000260355845009408	postive
PREX2	C22orf24	0.630979762217771	4.830111759913e-05	postive
PRKCQ	C22orf24	0.56266414251759	0.000434191576104132	postive
PROKR2	C22orf24	-0.564316048785036	0.000414040232312241	negative
PSG11	C22orf24	0.626610216294351	5.64595332213001e-05	postive
PSMA8	C22orf24	0.572891057861244	0.000322214082801879	postive
PSORS1C2	C22orf24	0.610851871443662	9.72478843288742e-05	postive
PTH	C22orf24	0.590460319810982	0.000188541331621467	postive
PTH2	C22orf24	0.613153879021008	8.99850873149227e-05	postive
PTPN5	C22orf24	0.680354033545482	6.90868998838663e-06	postive
RAD9A	C22orf24	0.738412903655881	4.11587289961211e-07	postive
RADIL	C22orf24	0.570055457000669	0.000350336739611498	postive
RAG2	C22orf24	0.641116802982328	3.33165221204098e-05	postive
RAVER2	C22orf24	0.675232700576349	8.5970473024288e-06	postive
RBMXL3	C22orf24	0.577424407809142	0.000281418911456885	postive
RFPL4B	C22orf24	0.546740546370583	0.000677972612580803	postive
RFT1	C22orf24	0.63580037176342	4.05481213138217e-05	postive
RGS7BP	C22orf24	0.559414156330998	0.000476400960322559	postive
RNASE11	C22orf24	0.586595453675019	0.000212691625172044	postive
RNF113B	C22orf24	0.741593673924744	3.45305344027424e-07	postive
RNF115	C22orf24	0.552243821637488	0.000582664206608977	postive
RNF175	C22orf24	0.66673668666064	1.22422264889403e-05	postive
RPTN	C22orf24	0.701929841083235	2.61757175671674e-06	postive
SCML4	C22orf24	0.634959724089039	4.1813295317687e-05	postive
SCNN1D	C22orf24	0.758259417652638	1.3181197975163e-07	postive
SERPINB13	C22orf24	0.670801520890983	1.03520743546738e-05	postive
SGCZ	C22orf24	0.576523770201017	0.00028913567796253	postive
SH2D4B	C22orf24	0.708769463936348	1.8902082365568e-06	postive
SHC3	C22orf24	0.532436090952208	0.00099324252507973	postive
SHISA3	C22orf24	0.551974143800488	0.00058704163574152	postive
SI	C22orf24	0.580105268580589	0.000259525364903397	postive
SIRPB2	C22orf24	-0.568756860573714	0.000363930787139434	negative
SLC15A1	C22orf24	0.73135650788716	6.02321398869899e-07	postive
SLC22A11	C22orf24	0.683199680589965	6.10692741601312e-06	postive
SLC22A16	C22orf24	0.55753704655222	0.000502407350106304	postive
SLC22A2	C22orf24	0.722814150443586	9.40384838473329e-07	postive
SLC22A24	C22orf24	0.770152564554101	6.31823909780257e-08	postive
SLC22A25	C22orf24	0.582533946489332	0.000241018551725029	postive
SLC5A6	C22orf24	0.618320142578432	7.54313391893399e-05	postive
SLC5A7	C22orf24	0.701121100107653	2.71868202844708e-06	postive
SLC6A3	C22orf24	0.628881211946297	5.20760824148271e-05	postive
SLC6A7	C22orf24	0.557416942615377	0.000504113455916614	postive
SLC9A2	C22orf24	0.564206803315222	0.000415346730500394	postive
SMG6	C22orf24	0.598339932962039	0.000146759661691004	postive
SMR3B	C22orf24	0.670014014882704	1.06960814423549e-05	postive
SNX31	C22orf24	0.58735559174458	0.000207734039368637	postive
SOS1	C22orf24	0.563134459025005	0.000428367277548894	postive
SOX15	C22orf24	0.71207528384973	1.60966508356901e-06	postive
SP4	C22orf24	0.652366262460591	2.17130896215818e-05	postive
SPACA7	C22orf24	0.776167774035799	4.28343616970928e-08	postive
SPAG11B	C22orf24	0.618388037224201	7.52550918625194e-05	postive
SPATA19	C22orf24	0.72235911777912	9.62527942830224e-07	postive
SSTR4	C22orf24	0.627573770047595	5.45605864160304e-05	postive
STATH	C22orf24	0.680141576189559	6.97223432244905e-06	postive
STBD1	C22orf24	0.566935504266405	0.000383788786868696	postive
STC1	C22orf24	0.707134253023709	2.04490525081155e-06	postive
STK32B	C22orf24	0.63422888500463	4.29420785448962e-05	postive
SYT14	C22orf24	0.569887027880804	0.000352073970166525	postive
TACR3	C22orf24	0.72657241077943	7.74576167547261e-07	postive
TAL1	C22orf24	0.607626642424887	0.000108310465762801	postive
TAS2R42	C22orf24	0.616580622054081	8.0075676055638e-05	postive
TAS2R50	C22orf24	0.676329260135463	8.20680645949118e-06	postive
TAS2R8	C22orf24	0.582130645051196	0.000244007595090217	postive
TBX20	C22orf24	0.575768303569442	0.00029575366675637	postive
TCEANC	C22orf24	0.535928338222138	0.000906235296466189	postive
TCL1A	C22orf24	0.590041026144159	0.000191036945523108	postive
TDRD5	C22orf24	0.538580144945362	0.000844735274651739	postive
TECRL	C22orf24	0.571563666923178	0.00033511780505656	postive
TECTB	C22orf24	0.590216942740154	0.000189986320283796	postive
TEX13A	C22orf24	0.753080428508676	1.79233681397837e-07	postive
TH	C22orf24	0.750945746358316	2.02998334551846e-07	postive
TINAG	C22orf24	0.687768011182872	4.99543278232542e-06	postive
TM4SF19	C22orf24	0.705462597211355	2.21494132265671e-06	postive
TM4SF20	C22orf24	0.54955098713602	0.000627702183187074	postive
TMC1	C22orf24	0.616343571798411	8.07281194530513e-05	postive
TMCO5A	C22orf24	0.758265674139791	1.31762449919967e-07	postive
TMEM174	C22orf24	0.741373183300568	3.49562499463057e-07	postive
TMEM71	C22orf24	0.618167184378614	7.58297656518249e-05	postive
TMEM95	C22orf24	-0.57396796518774	0.000312072889168015	negative
TMPRSS2	C22orf24	0.671077689122032	1.02338392037888e-05	postive
TNK1	C22orf24	0.605828346613003	0.000114958132672828	postive
TPD52L3	C22orf24	0.769378112845389	6.63686041532262e-08	postive
TPH2	C22orf24	0.593607578118446	0.000170721707245527	postive
TRHDE	C22orf24	0.581285732437584	0.000250377256372338	postive
TRIM49	C22orf24	0.658337471160998	1.71754864367676e-05	postive
TRPC5	C22orf24	0.640372689776438	3.42528778683862e-05	postive
TRPM5	C22orf24	0.723781210777189	8.94867380983992e-07	postive
TSPAN32	C22orf24	0.542397745108816	0.000762677440061575	postive
TXNL1	C22orf24	0.627151681799007	5.53852158503398e-05	postive
UBE2U	C22orf24	0.54840212364109	0.000647838009863675	postive
UNC13D	C22orf24	0.538978010719104	0.000835833694870503	postive
UNG	C22orf24	0.66682756058502	1.21967530970229e-05	postive
UPB1	C22orf24	0.597321767957146	0.00015164396227018	postive
USP26	C22orf24	0.568185538745618	0.000370058944405701	postive
VGLL2	C22orf24	0.546352441126312	0.00068518771253856	postive
VN1R2	C22orf24	0.793171766662869	1.33445300692251e-08	postive
VNN3	C22orf24	0.739024309079054	3.98004530683877e-07	postive
VWA5B1	C22orf24	0.757286071035515	1.39729722867694e-07	postive
VWC2	C22orf24	0.640738024329805	3.37902246020821e-05	postive
VWC2L	C22orf24	0.540347384601868	0.000805826673367034	postive
WBP2NL	C22orf24	0.552376369251043	0.000580523317656304	postive
WDR19	C22orf24	0.735850353713652	4.73275401911986e-07	postive
WDR76	C22orf24	0.740915115799684	3.58561264744781e-07	postive
ZBTB12	C22orf24	0.766360154315412	8.02509676734694e-08	postive
ZDHHC15	C22orf24	0.549868160202341	0.000622241818905122	postive
ZFP41	C22orf24	0.774628779626309	4.73662001663776e-08	postive
ZIM3	C22orf24	0.640677910052535	3.38659615269258e-05	postive
ZNF100	C22orf24	0.648223846055036	2.547216573429e-05	postive
ZNF221	C22orf24	0.723443773315201	9.10515225727605e-07	postive
ZNF224	C22orf24	0.552143759357986	0.000584285033880852	postive
ZNF253	C22orf24	0.58688760111109	0.000210773867038483	postive
ZNF33B	C22orf24	0.699727890313838	2.90126829656715e-06	postive
ZNF354C	C22orf24	0.763321683493847	9.68890543766525e-08	postive
ZNF414	C22orf24	0.537732715736458	0.000863974863819427	postive
ZNF43	C22orf24	0.592274634616995	0.000178075727011664	postive
ZNF454	C22orf24	0.732706754233698	5.60509300653516e-07	postive
ZNF567	C22orf24	0.535041668850814	0.000927663124878359	postive
ZNF709	C22orf24	0.559600131641605	0.000473890694286679	postive
ZNF99	C22orf24	0.560009732168887	0.000468403387212658	postive
ZSCAN1	C22orf24	0.666639049614967	1.22912558122587e-05	postive
ZSWIM2	C22orf24	0.659637022824393	1.63100235777218e-05	postive
ARTN	C5orf64	-0.612545331832283	9.18559745977365e-05	negative
ATXN1L	C5orf64	0.561670874888921	0.000446724007968086	postive
C16orf78	C5orf64	0.582537000400966	0.000240996043259905	postive
CCDC28A	C5orf64	-0.577913974013253	0.000277301857360526	negative
EMID1	C5orf64	0.563242337190496	0.000427041177900563	postive
FAM83C	C5orf64	-0.619597509918331	7.21769613257878e-05	negative
GOLGA6L6	C5orf64	0.54265649049411	0.000757380169501647	postive
GPHA2	C5orf64	0.599774312081203	0.000140118114601541	postive
GPX5	C5orf64	0.534585880144624	0.000938851113218789	postive
IFNGR1	C5orf64	-0.57766085418973	0.000279423728884197	negative
KCNV2	C5orf64	0.532350030281837	0.000995476635504168	postive
LRFN1	C5orf64	-0.560322215094627	0.000464255194731813	negative
MAGEF1	C5orf64	0.561373617646614	0.000450536638610884	postive
MAML3	C5orf64	0.609599844159513	0.000101415533443152	postive
MUC6	C5orf64	0.539225308355959	0.000830342701678354	postive
NGF	C5orf64	0.61666666762179	7.98400263362777e-05	postive
NPBWR2	C5orf64	0.561210618390814	0.000452639531647598	postive
NUMBL	C5orf64	0.532296604179233	0.000996865791197832	postive
PDLIM5	C5orf64	-0.643487393174518	3.04858201159277e-05	negative
PPP1R12C	C5orf64	-0.597771825479002	0.000149467268845191	negative
SPACA1	C5orf64	0.534268577355785	0.000946709929357073	postive
TAS2R19	C5orf64	0.540579988178129	0.000800825413173481	postive
UGT2A1	C5orf64	0.579148876162613	0.00026715472971072	postive
UPK3B	C5orf64	0.562653102939629	0.000434329129859772	postive
ABCA9	C6orf99	-0.546862245626298	0.00067572405598724	negative
ADCY6	C6orf99	0.608157927113272	0.000106413738018576	postive
ANKRD30A	C6orf99	0.621649286558175	6.72136733904532e-05	postive
ANKRD50	C6orf99	0.560667243242789	0.000459712931976672	postive
AP1M2	C6orf99	0.638633397408056	3.65350537809101e-05	postive
ARHGEF16	C6orf99	0.540679935310434	0.000798684872768438	postive
ARL1	C6orf99	0.580565347222926	0.000255925029829789	postive
ATP2C2	C6orf99	0.575911716474968	0.000294487053156501	postive
AVL9	C6orf99	0.61093295532867	9.69833672564535e-05	postive
BACE1	C6orf99	-0.59691681738344	0.000153626748583499	negative
BRF2	C6orf99	0.544808862238481	0.000714561455328049	postive
C3orf52	C6orf99	0.642894448381123	3.11726497791084e-05	postive
CALCOCO2	C6orf99	0.637962722475383	3.7451180961231e-05	postive
CAMSAP3	C6orf99	0.618845057545663	7.40783359222335e-05	postive
CANT1	C6orf99	0.603888895535802	0.000122536446719213	postive
CBR3	C6orf99	0.540328973021133	0.000806223721777477	postive
CCDC125	C6orf99	0.596876452248313	0.000153825659634897	postive
CDH1	C6orf99	0.547476735364475	0.000664471119231761	postive
CDS1	C6orf99	0.58804122941905	0.000203351310000749	postive
CERS6	C6orf99	0.622048847894945	6.62837110060216e-05	postive
COPZ1	C6orf99	0.582937717816134	0.000238058853144842	postive
COQ5	C6orf99	0.566460300159244	0.000389126052448161	postive
CPNE2	C6orf99	-0.538558220462172	0.000845228224784795	negative
CREB3L4	C6orf99	0.54909782078848	0.000635577467327008	postive
CYB561	C6orf99	0.750976194961832	2.02639904019703e-07	postive
DMD	C6orf99	-0.546489597583046	0.000682630162400425	negative
DNAJC1	C6orf99	0.533170043867543	0.000974368332639151	postive
ELMOD2	C6orf99	0.570203732497945	0.000348813706767104	postive
EPB41L1	C6orf99	-0.56118953283806	0.000452912198025563	negative
EPN3	C6orf99	0.713191650943936	1.52389910246338e-06	postive
ERGIC1	C6orf99	0.600938884783009	0.000134925594797392	postive
ESRP2	C6orf99	0.663732849461547	1.38349078226539e-05	postive
EZR	C6orf99	0.661736744982295	1.49949994895552e-05	postive
F12	C6orf99	0.572973715986437	0.000321425410147349	postive
FAAH2	C6orf99	0.559407195992448	0.000476495138897197	postive
FAM104A	C6orf99	0.543389939381953	0.000742540838859409	postive
FAM110A	C6orf99	0.660521661133705	1.57437333443938e-05	postive
FAT2	C6orf99	-0.549587061454109	0.000627079004226431	negative
FGF13	C6orf99	0.597877717450027	0.000148959214879887	postive
FOXA1	C6orf99	0.585558282411179	0.000219626710717421	postive
GALNT6	C6orf99	0.66946554114076	1.09417777542931e-05	postive
GGCT	C6orf99	0.623895639663307	6.21342834799828e-05	postive
GPR160	C6orf99	0.586234585439012	0.000215082033116356	postive
GRTP1	C6orf99	0.577916598610128	0.000277279931265236	postive
GSN	C6orf99	-0.536341472871118	0.000896401374123963	negative
HHAT	C6orf99	0.605330101789454	0.000116863691221556	postive
HOOK2	C6orf99	0.564456211203757	0.000412369346079853	postive
HOXC11	C6orf99	0.546035502941235	0.000691130135525567	postive
ICA1	C6orf99	0.588491425860329	0.000200518760215939	postive
ID4	C6orf99	-0.568071344049988	0.000371294792661992	negative
IFFO2	C6orf99	-0.56853639893876	0.000366284724328612	negative
INTS12	C6orf99	0.539704102419306	0.000819802126137219	postive
KAT7	C6orf99	0.574732254185212	0.000305049348287244	postive
KCNMB3	C6orf99	0.605170337552395	0.000117480696946351	postive
KIAA1522	C6orf99	0.553565418092249	0.000561627882960594	postive
KIF12	C6orf99	0.568760419541771	0.00036389289772888	postive
KLF13	C6orf99	-0.540636128413565	0.000799622449477548	negative
KRT5	C6orf99	-0.536846427217682	0.000884509936063771	negative
LCA5L	C6orf99	0.543319041583195	0.000743963940368777	postive
LNX2	C6orf99	0.571312697741023	0.000337608643404687	postive
LRBA	C6orf99	0.563931643230244	0.000418653720761244	postive
LRRC46	C6orf99	0.651949842774914	2.20668116377654e-05	postive
LRRC59	C6orf99	0.658247934122981	1.72366228118161e-05	postive
LRRC8E	C6orf99	0.573099899350022	0.000320224766332811	postive
MARVELD3	C6orf99	0.684061215910759	5.88148164006742e-06	postive
MED13	C6orf99	0.576473124611938	0.000289575170667573	postive
MIPEP	C6orf99	0.623505559194223	6.29906821262191e-05	postive
MLPH	C6orf99	0.640706933669176	3.38293760281073e-05	postive
MRPL27	C6orf99	0.585247834364922	0.00022174150046316	postive
N4BP2L1	C6orf99	-0.575314443994969	0.000299794225910156	negative
NR2F6	C6orf99	0.574076873502472	0.000311063328854437	postive
NYNRIN	C6orf99	-0.569266903705518	0.000358536478180118	negative
ORMDL3	C6orf99	0.587618493859661	0.000206043625692025	postive
PLEKHF2	C6orf99	0.56707280191378	0.000382258912273558	postive
PMM2	C6orf99	0.607051656170906	0.00011039740125538	postive
PPP1R16B	C6orf99	-0.585078098510041	0.000222905435242152	negative
PRR15L	C6orf99	0.672392780545388	9.68748269158152e-06	postive
PRR5-ARHGAP8	C6orf99	0.661193163989208	1.53258621336163e-05	postive
PSMD3	C6orf99	0.540642887292754	0.000799477729158781	postive
RAB11FIP1	C6orf99	0.676679874467941	8.08547597365041e-06	postive
RAB25	C6orf99	0.592971511712292	0.000174196314465421	postive
RAB27B	C6orf99	0.558884846900481	0.000483610305787125	postive
RABEP2	C6orf99	0.5356755299632	0.000912299817962969	postive
RABIF	C6orf99	0.61391298225285	8.76994344626279e-05	postive
RASEF	C6orf99	0.710106229357576	1.77178102688968e-06	postive
RBM47	C6orf99	0.560021858121579	0.000468241803508882	postive
RGMA	C6orf99	-0.599421063366814	0.000141728217100329	negative
RGR	C6orf99	-0.573152416427676	0.000319726242428333	negative
RPN2	C6orf99	0.56047380837063	0.000462254592927776	postive
RUSC2	C6orf99	-0.601591537030255	0.000132091726321281	negative
SH2D4A	C6orf99	0.568860237654236	0.000362831646715437	postive
SH3BP4	C6orf99	0.55172685676319	0.000591081229560307	postive
SLC27A1	C6orf99	-0.587145178734464	0.000209095886560959	negative
SLC2A10	C6orf99	0.697462805599808	3.2221609740491e-06	postive
SLC2A5	C6orf99	-0.606228026508591	0.000113449769756838	negative
SLC35B1	C6orf99	0.648689475937361	2.50220473143515e-05	postive
SLC44A4	C6orf99	0.581005654397341	0.000252521272049612	postive
SLC50A1	C6orf99	0.639986554948005	3.47480944752275e-05	postive
SLC9A3R1	C6orf99	0.570663566236649	0.000344127913086365	postive
SNF8	C6orf99	0.660085744153896	1.60205101400795e-05	postive
SNX11	C6orf99	0.546088994067636	0.000690124015018525	postive
SPATA17	C6orf99	0.543147080479885	0.000747425674496718	postive
SPTBN1	C6orf99	-0.611925959184556	9.37960085443758e-05	negative
TACO1	C6orf99	0.605159990577119	0.000117520757437336	postive
TFF3	C6orf99	0.542867536270908	0.000753083581470621	postive
TJP3	C6orf99	0.533814613011925	0.000958054480066097	postive
TMC4	C6orf99	0.612679377503392	9.14408919409402e-05	postive
TMEM116	C6orf99	0.630237881455332	4.96064273838881e-05	postive
TMEM238	C6orf99	0.537840332576852	0.000861510317996154	postive
TMEM87B	C6orf99	0.552136440652525	0.000584403740439079	postive
TOB1	C6orf99	0.574893694458901	0.000303583939087307	postive
TP53RK	C6orf99	0.641937937124049	3.23101746704318e-05	postive
TRAF4	C6orf99	0.640870601749365	3.36237339739567e-05	postive
TRIM2	C6orf99	-0.581835030700294	0.000246219518625972	negative
TRIM43	C6orf99	-0.573467256105821	0.000316752079463171	negative
TRIM64	C6orf99	-0.57957928960891	0.000263696778550355	negative
TRPM4	C6orf99	0.580177485118937	0.000258957259389906	postive
TSPAN13	C6orf99	0.676577784857127	8.12063458880698e-06	postive
TTC30A	C6orf99	0.535620165077687	0.000913632718925552	postive
UBE2Z	C6orf99	0.642778416423933	3.13086808754107e-05	postive
UHMK1	C6orf99	0.631306721978469	4.77357561964944e-05	postive
VPS37C	C6orf99	0.643945870837051	2.99641712516994e-05	postive
XBP1	C6orf99	0.556038904277982	0.000524060345361734	postive
ZBTB47	C6orf99	-0.612818496869476	9.10118836033065e-05	negative
ZIC1	C6orf99	-0.550429013067261	0.000612689324812819	negative
ZNF552	C6orf99	0.557120956105381	0.00050834000676974	postive
ZNF587	C6orf99	0.535223686730051	0.000923228230872423	postive
ZNF607	C6orf99	0.622322968239404	6.56524326122487e-05	postive
ZSCAN22	C6orf99	0.535194581773207	0.00092393611782951	postive
ADAM33	C8orf31	0.539545541595987	0.000823279641009369	postive
ANKRD62	C8orf31	-0.569963994389234	0.000351279163378765	negative
C22orf31	C8orf31	0.537947390782087	0.000859064731399051	postive
CCDC166	C8orf31	0.534665554732491	0.000936886837252823	postive
CCIN	C8orf31	0.535774492600232	0.000909921585398962	postive
CRYGA	C8orf31	0.538590691933159	0.000844498226682285	postive
GPR119	C8orf31	0.645783717248919	2.7953221039025e-05	postive
GPR27	C8orf31	-0.660860282747829	1.55317360743918e-05	negative
IFNA4	C8orf31	0.590833951060323	0.000186342138193575	postive
KLF14	C8orf31	0.570919023261241	0.000341549071898972	postive
KRTAP4-11	C8orf31	0.556841260818483	0.000512362820949282	postive
LHB	C8orf31	0.552746737287222	0.000574578135330903	postive
MYOZ3	C8orf31	0.540813555224644	0.00079583107596618	postive
OCM2	C8orf31	0.554058446925971	0.000553954509574503	postive
PIGN	C8orf31	-0.577183261806876	0.000283466840901706	negative
PLA2G2D	C8orf31	0.544794810637473	0.000714833894185541	postive
RAPSN	C8orf31	0.58806561109815	0.000203196992855388	postive
RNF151	C8orf31	0.559957003239396	0.000469106600145444	postive
SLC22A10	C8orf31	0.565730621901645	0.000397450146428516	postive
SPINK7	C8orf31	0.545075407325606	0.000709410938521486	postive
TESK1	C8orf31	-0.542668059572817	0.00075714407904163	negative
ADCYAP1	CASC2	-0.585511972964716	0.00021994102403669	negative
AK5	CASC2	-0.550497872172849	0.000611525519565462	negative
BCAS4	CASC2	0.60287893701238	0.000126657864072857	postive
CASP7	CASC2	0.583391356892444	0.000234772408108031	postive
CRYAB	CASC2	-0.552016860196239	0.000586346321781405	negative
MEGF10	CASC2	-0.535637462428554	0.000913216103321418	negative
OR10H4	CASC2	-0.566770766867912	0.000385631609916814	negative
SMPDL3B	CASC2	0.56149918250135	0.000448922624374361	postive
SNX3	CASC2	-0.53318432701458	0.000974004191408289	negative
SORBS1	CASC2	-0.537010984623067	0.000880664907186101	negative
SYNM	CASC2	-0.609544487969936	0.000101603451121567	negative
AADAC	CRNDE	-0.611175129849795	9.61971782283677e-05	negative
ABCA9	CRNDE	-0.60312748986896	0.000125632192097289	negative
ACOX3	CRNDE	0.553803569233206	0.000557909662433281	postive
AFAP1L2	CRNDE	-0.732549441261896	5.65239726949367e-07	negative
ANKRD6	CRNDE	-0.549401872428435	0.000630283948297875	negative
ANXA13	CRNDE	-0.558176194304499	0.000493414089391783	negative
ARL5A	CRNDE	-0.594313640337081	0.000166937578057714	negative
BACE1	CRNDE	-0.595770729082803	0.000159365043747177	negative
BHLHE41	CRNDE	-0.589887137049881	0.000191960278611541	negative
C1QTNF9	CRNDE	-0.552721352189552	0.000574983888096387	negative
CDH6	CRNDE	-0.6370386762116	3.87474367118271e-05	negative
CDR2	CRNDE	0.556229029240368	0.000521267288471984	postive
CHL1	CRNDE	-0.572694614676242	0.000324095350400389	negative
CIR1	CRNDE	-0.562536736296186	0.000435781424217681	negative
CLDN16	CRNDE	-0.705718119728035	2.1881401733796e-06	negative
CLEC12A	CRNDE	-0.535761287921857	0.000910238598363497	negative
CYP2C18	CRNDE	-0.596132000473449	0.000157535811734022	negative
DCAF12L1	CRNDE	-0.739204268829978	3.94085762075516e-07	negative
DEFB1	CRNDE	-0.54626135275564	0.000686890919494949	negative
DEFB104B	CRNDE	-0.693569628731243	3.85031661044963e-06	negative
DEFB126	CRNDE	-0.5511320946597	0.00060089818886794	negative
EDAR	CRNDE	-0.542335031509269	0.000763966294656352	negative
FAM166B	CRNDE	-0.544551166569892	0.000719572420377222	negative
FAM181A	CRNDE	-0.604049249618639	0.000121893275293789	negative
FAT2	CRNDE	-0.570737493344649	0.000343379839684374	negative
FBXL14	CRNDE	-0.593646575346893	0.000170510713847793	negative
FGF18	CRNDE	-0.540101652817603	0.000811140187096862	negative
FLG	CRNDE	-0.535457699563862	0.000917553983380803	negative
FREM3	CRNDE	-0.576813889067457	0.000286629536114326	negative
FRMD4B	CRNDE	-0.573603397892987	0.000315473663334786	negative
IRX3	CRNDE	0.795375737390742	1.13823584256649e-08	postive
IRX5	CRNDE	0.856433146709764	5.33210424708877e-11	postive
KCNIP1	CRNDE	-0.625249433851852	5.92429418075915e-05	negative
KCTD12	CRNDE	-0.623562016142589	6.28660791027934e-05	negative
KIAA1324	CRNDE	0.593525028929458	0.000171169109244532	postive
LRRC3B	CRNDE	-0.594737743841682	0.000164700907749464	negative
LRRK1	CRNDE	-0.584059477105355	0.000230005970018553	negative
LRRTM1	CRNDE	-0.563160554327325	0.000428046163822918	negative
N4BP2L1	CRNDE	-0.588465383519583	0.000200681646158446	negative
OTC	CRNDE	-0.770320937098773	6.25086157728158e-08	negative
PKD1L1	CRNDE	-0.568208633869329	0.000369809448171092	negative
PKHD1L1	CRNDE	-0.680740646576486	6.79440868479551e-06	negative
PLTP	CRNDE	-0.545493739877533	0.000701393657707045	negative
PPP1R16B	CRNDE	-0.546650554184868	0.000679639598693861	negative
RIMBP2	CRNDE	-0.560184136332945	0.000466084137847546	negative
RTN4RL1	CRNDE	0.570507641352316	0.000345710492134103	postive
SBK1	CRNDE	0.571636929933087	0.000334393774650788	postive
SLC35A3	CRNDE	0.547845534930905	0.000657797434748066	postive
SLC6A12	CRNDE	-0.59363342843985	0.000170581818691465	negative
SLITRK2	CRNDE	-0.535135213622514	0.000925381548184239	negative
SPOCK2	CRNDE	-0.62473454861658	6.03279788218541e-05	negative
STOX2	CRNDE	-0.559831542584275	0.000470783565072574	negative
SUCNR1	CRNDE	-0.720834307870844	1.04025921590746e-06	negative
SV2C	CRNDE	-0.628977612162123	5.18970024726786e-05	negative
TFAP2A	CRNDE	0.556197718952113	0.000521726345327523	postive
TIMD4	CRNDE	-0.533996238420234	0.000953501349723045	negative
TMEM54	CRNDE	0.647683513617061	2.60036845668609e-05	postive
TSPAN13	CRNDE	0.536485207447565	0.000893002200518069	postive
TTC39A	CRNDE	0.604839412308141	0.000118768039920954	postive
TUSC1	CRNDE	0.618119038588488	7.59555677635613e-05	postive
WNT2	CRNDE	-0.5753197996526	0.000299746260541856	negative
WNT7A	CRNDE	-0.659677171228382	1.62839278584483e-05	negative
YWHAH	CRNDE	-0.554688917266457	0.000544277681432721	negative
ZBED2	CRNDE	-0.601826799601209	0.000131083373388956	negative
ZNF10	CRNDE	0.542762151478322	0.000755226360476418	postive
ZNF185	CRNDE	-0.540357996228169	0.000805597910659176	negative
ZNF524	CRNDE	0.578442433466574	0.000272918158799713	postive
A4GNT	CYP1B1-AS1	0.649456512095732	2.42962537264511e-05	postive
AGTR2	CYP1B1-AS1	0.542727974089592	0.000755922443637537	postive
AKR1C4	CYP1B1-AS1	0.746312011095208	2.64874831723488e-07	postive
AKT3	CYP1B1-AS1	0.61502641244435	8.4441371875779e-05	postive
ANKRD60	CYP1B1-AS1	0.745820187575459	2.72370989176101e-07	postive
ARHGEF15	CYP1B1-AS1	-0.548120352647944	0.000652863104094703	negative
ATOH1	CYP1B1-AS1	0.629870422662818	5.02646780115122e-05	postive
BNC1	CYP1B1-AS1	0.581714704723367	0.000247124972563391	postive
BPY2B	CYP1B1-AS1	0.563575585206646	0.00042296774038144	postive
C10orf67	CYP1B1-AS1	0.566375069748565	0.000390090278174397	postive
C3orf36	CYP1B1-AS1	0.756881575981202	1.43147053627688e-07	postive
CABS1	CYP1B1-AS1	0.546946227881058	0.000674176226246575	postive
CCDC105	CYP1B1-AS1	0.7156432988222	1.35003332388564e-06	postive
CD160	CYP1B1-AS1	0.569220940232894	0.000359019658519922	postive
CER1	CYP1B1-AS1	0.573330332285464	0.000318042497606118	postive
CFHR5	CYP1B1-AS1	0.63972785931876	3.50834840249745e-05	postive
CHST3	CYP1B1-AS1	0.560005449975687	0.000468460461179919	postive
CRISP3	CYP1B1-AS1	0.580012743661778	0.000260254857160116	postive
CSH1	CYP1B1-AS1	-0.53727618392952	0.000874499359827849	negative
CSHL1	CYP1B1-AS1	-0.573090888318291	0.00032031037414468	negative
CXCL5	CYP1B1-AS1	0.577731893947028	0.000278826753207815	postive
CYP4A11	CYP1B1-AS1	-0.600612806986592	0.000136361790864492	negative
DEFA5	CYP1B1-AS1	0.810781742807972	3.53927729680859e-09	postive
DSG4	CYP1B1-AS1	0.59824866040446	0.000147191679193333	postive
DTHD1	CYP1B1-AS1	0.558184471465566	0.0004932985682025	postive
DYDC1	CYP1B1-AS1	0.653047395464977	2.11455768132008e-05	postive
DZIP1L	CYP1B1-AS1	0.543416723449263	0.000742003840916853	postive
ETV3L	CYP1B1-AS1	0.734304254272262	5.14488028554425e-07	postive
FABP2	CYP1B1-AS1	0.572734632477165	0.000323711321456197	postive
FOXN1	CYP1B1-AS1	-0.564338676309403	0.000413770080842556	negative
GAPDHS	CYP1B1-AS1	0.659436512521817	1.64409206607484e-05	postive
GFRAL	CYP1B1-AS1	0.549779520887057	0.000623763552892465	postive
GH1	CYP1B1-AS1	-0.54132760824354	0.000784936049853323	negative
GJA10	CYP1B1-AS1	0.703652274489363	2.41358604302273e-06	postive
GLIS3	CYP1B1-AS1	0.573597682256458	0.000315527242350101	postive
HRH4	CYP1B1-AS1	0.535921553818489	0.000906397578889011	postive
IFNA2	CYP1B1-AS1	0.536305208851734	0.000897260783833093	postive
IQCF5	CYP1B1-AS1	0.55853858174566	0.000488378835319312	postive
IRS4	CYP1B1-AS1	0.606486040118285	0.000112485514768623	postive
ITGA9	CYP1B1-AS1	0.5662163502239	0.000391891569375968	postive
KCNB2	CYP1B1-AS1	0.681992273879502	6.43614153342222e-06	postive
KCNK18	CYP1B1-AS1	0.533953247942832	0.000954577340359636	postive
KLRF2	CYP1B1-AS1	0.631143724130344	4.80168520069292e-05	postive
KRT73	CYP1B1-AS1	0.816175272846039	2.29274213740632e-09	postive
KRT74	CYP1B1-AS1	0.555698907142241	0.000529088268340353	postive
KRT75	CYP1B1-AS1	0.703487437768273	2.43245891742822e-06	postive
KRTAP9-8	CYP1B1-AS1	0.640437694674319	3.41701400493236e-05	postive
LCE1B	CYP1B1-AS1	0.563561323315643	0.000423141359108567	postive
LDHAL6B	CYP1B1-AS1	0.542402310048183	0.000762583699153922	postive
LGALS14	CYP1B1-AS1	0.613712250301336	8.82986981288329e-05	postive
LHX9	CYP1B1-AS1	0.587809390359035	0.000204823920432838	postive
MAGEB4	CYP1B1-AS1	0.780825542204872	3.14410984270226e-08	postive
MARK4	CYP1B1-AS1	0.588461819778752	0.000200703945349121	postive
MLNR	CYP1B1-AS1	0.546581118119758	0.000680928290184169	postive
MYH8	CYP1B1-AS1	0.736467923271013	4.57678136572847e-07	postive
MYNN	CYP1B1-AS1	0.556042986059346	0.000524000242075947	postive
MYOG	CYP1B1-AS1	-0.546304925975587	0.000686075702644491	negative
NKAIN3	CYP1B1-AS1	0.648610600680301	2.50977843564898e-05	postive
NMBR	CYP1B1-AS1	0.665379825012247	1.29397806249629e-05	postive
OIT3	CYP1B1-AS1	0.632554873229095	4.56320498205028e-05	postive
OR1A1	CYP1B1-AS1	0.594410890868351	0.000166422298942326	postive
OR5P3	CYP1B1-AS1	0.544285480347951	0.000724771309998926	postive
OR6A2	CYP1B1-AS1	0.582247672112374	0.00024313686294376	postive
PAPOLB	CYP1B1-AS1	0.536673018557297	0.000888577822662339	postive
PATE1	CYP1B1-AS1	0.574298137499398	0.000309021219109486	postive
PCDHGA5	CYP1B1-AS1	0.560973721181017	0.000455711360297846	postive
PITPNM3	CYP1B1-AS1	0.56633758375909	0.000390515036509915	postive
PLA2G2F	CYP1B1-AS1	0.596130949548352	0.000157541105485806	postive
PM20D1	CYP1B1-AS1	0.600042006800504	0.000138908918382128	postive
PPEF2	CYP1B1-AS1	0.665833795585144	1.2702477563489e-05	postive
PSMA8	CYP1B1-AS1	0.618100971550526	7.60028243562373e-05	postive
PXT1	CYP1B1-AS1	0.557673958030424	0.000500468746996089	postive
RGSL1	CYP1B1-AS1	0.842485882967588	2.20713793061938e-10	postive
RNF17	CYP1B1-AS1	0.547799271204642	0.000658631338035533	postive
RPE65	CYP1B1-AS1	0.556003801891698	0.000524577472621808	postive
RXFP3	CYP1B1-AS1	-0.565305232639633	0.000402375749252139	negative
SEC14L3	CYP1B1-AS1	0.577431197523936	0.000281361441572216	postive
SERPINE3	CYP1B1-AS1	0.636398358756716	3.96693233350139e-05	postive
SH3RF2	CYP1B1-AS1	-0.629350454988333	5.12096036143548e-05	negative
SHCBP1L	CYP1B1-AS1	0.614236755974845	8.67405528512789e-05	postive
SI	CYP1B1-AS1	0.54823270304344	0.000650855325629351	postive
SLC22A25	CYP1B1-AS1	0.548850585413434	0.000639910828592508	postive
SLC9B1	CYP1B1-AS1	-0.581079068621893	0.000251957700835887	negative
SPANXN3	CYP1B1-AS1	0.535350435502636	0.000920151044393675	postive
SPO11	CYP1B1-AS1	0.847793659005765	1.30704829950921e-10	postive
SPTBN5	CYP1B1-AS1	0.57090239709649	0.000341716387609948	postive
TAAR1	CYP1B1-AS1	0.579852394041261	0.000261523437219861	postive
TAAR6	CYP1B1-AS1	0.723921891194269	8.88416780962869e-07	postive
TAS2R42	CYP1B1-AS1	0.545830695888327	0.000694994393341583	postive
TBX22	CYP1B1-AS1	0.590077047264505	0.000190821394325214	postive
TMPRSS12	CYP1B1-AS1	0.751287285323572	1.99011065324377e-07	postive
TRIM60	CYP1B1-AS1	0.541559091486857	0.000780073140179794	postive
UBE2U	CYP1B1-AS1	0.623892703393587	6.21406904702722e-05	postive
UBQLN2	CYP1B1-AS1	-0.543259418625564	0.000745162594642651	negative
ZNF585A	CYP1B1-AS1	-0.6726844882547	9.56994724791246e-06	negative
ZNF716	CYP1B1-AS1	-0.552179982740837	0.00058369781955371	negative
ABCB5	DAOA-AS1	0.590227365154418	0.000189924237237848	postive
ABHD10	DAOA-AS1	0.581726769413441	0.000247034051646795	postive
ACBD4	DAOA-AS1	0.689470577292798	4.63080260767254e-06	postive
ACE	DAOA-AS1	0.610359893994723	9.88668046647794e-05	postive
ADAM29	DAOA-AS1	0.704518544491325	2.31658451135845e-06	postive
ADAM30	DAOA-AS1	0.693467477400019	3.86820869921108e-06	postive
ADAMTS15	DAOA-AS1	0.683619374881787	5.99613675645176e-06	postive
ADAMTS20	DAOA-AS1	0.753726459844935	1.72563334198544e-07	postive
ADCY10	DAOA-AS1	0.744371815186419	2.95593988904723e-07	postive
ADCYAP1R1	DAOA-AS1	-0.558500237825139	0.000488909442737591	negative
ADH7	DAOA-AS1	0.959024220645766	1.20737763865558e-19	postive
ADIG	DAOA-AS1	0.629662175708856	5.06412141554038e-05	postive
AFM	DAOA-AS1	0.746668413623995	2.59561735611838e-07	postive
AGTR2	DAOA-AS1	0.989950053536269	1.28862062454759e-29	postive
AGXT2	DAOA-AS1	0.537846321472148	0.000861373348261425	postive
AIPL1	DAOA-AS1	0.705998448922024	2.15907843873848e-06	postive
AKR1C4	DAOA-AS1	0.780700256102221	3.1706787465437e-08	postive
ALPI	DAOA-AS1	-0.580457522301999	0.000256764783926098	negative
AMELY	DAOA-AS1	0.597723420800623	0.000149700024467775	postive
ANGPT4	DAOA-AS1	-0.54260909602505	0.000758348029686916	negative
ANGPTL3	DAOA-AS1	0.815857614865585	2.35304084365665e-09	postive
ANKLE1	DAOA-AS1	0.60916390270076	0.0001029039228044	postive
ANKRD29	DAOA-AS1	0.731538858592669	5.96512290699806e-07	postive
ANKRD31	DAOA-AS1	0.784428678020581	2.46247537733541e-08	postive
ANKRD34B	DAOA-AS1	0.566750783990345	0.000385855681915444	postive
ANKRD45	DAOA-AS1	0.646329969448803	2.73795397215795e-05	postive
ANKRD60	DAOA-AS1	0.653309676619671	2.09306579000031e-05	postive
ANO7	DAOA-AS1	0.579903197031391	0.00026112092111714	postive
AQP10	DAOA-AS1	0.706131508912154	2.14540800049371e-06	postive
ARHGAP20	DAOA-AS1	0.744307211639223	2.96671026184487e-07	postive
ARHGAP25	DAOA-AS1	0.685154937154278	5.60620995896931e-06	postive
ARHGEF15	DAOA-AS1	-0.641055263178562	3.33930729813628e-05	negative
ASB11	DAOA-AS1	0.92553609827183	1.79124048305632e-15	postive
ASB17	DAOA-AS1	0.79008509607454	1.66210989177797e-08	postive
ATF7IP2	DAOA-AS1	0.598908732374616	0.000144092916701629	postive
ATOH1	DAOA-AS1	0.635937297976094	4.03453565635499e-05	postive
ATP10A	DAOA-AS1	0.563552367803718	0.000423250412441421	postive
ATP1B4	DAOA-AS1	0.81113803737033	3.44067176383473e-09	postive
ATPAF1	DAOA-AS1	0.669814794060164	1.07847388877571e-05	postive
ATXN1L	DAOA-AS1	-0.545206211991584	0.00070689541206575	negative
ATXN3L	DAOA-AS1	0.73669578848511	4.52043418051038e-07	postive
ATXN7L3B	DAOA-AS1	-0.541462867304495	0.000782091334377485	negative
B2M	DAOA-AS1	0.532949876281101	0.000979996606112812	postive
B3GAT2	DAOA-AS1	0.698713177731643	3.04122658708197e-06	postive
B4GALT6	DAOA-AS1	0.608738108109655	0.00010437659829644	postive
BAAT	DAOA-AS1	0.732571427847149	5.6457639180323e-07	postive
BACH2	DAOA-AS1	0.579157184882603	0.000267087595777274	postive
BNC1	DAOA-AS1	0.57125179303833	0.000338215598021529	postive
BOLL	DAOA-AS1	0.782017516270161	2.90141334861979e-08	postive
BPIFB4	DAOA-AS1	0.548565507364442	0.000644939956716312	postive
BPIFB6	DAOA-AS1	0.771388423514246	5.83886768177886e-08	postive
BPIFC	DAOA-AS1	0.699212502229083	2.97160251545713e-06	postive
BPY2B	DAOA-AS1	0.993592657630883	7.874293071413e-33	postive
C10orf53	DAOA-AS1	0.828832696191994	7.81176775076392e-10	postive
C10orf67	DAOA-AS1	0.981658709393362	2.48047891759341e-25	postive
C10orf88	DAOA-AS1	0.646811982507046	2.6882201298245e-05	postive
C12orf42	DAOA-AS1	0.710584007697483	1.73112802442208e-06	postive
C14orf39	DAOA-AS1	0.724014349563032	8.84200541198189e-07	postive
C16orf46	DAOA-AS1	0.725418582310889	8.22379392491794e-07	postive
C17orf67	DAOA-AS1	0.639840688377737	3.49368468424086e-05	postive
C1orf94	DAOA-AS1	0.714381683561293	1.43709583500259e-06	postive
C3orf22	DAOA-AS1	-0.592403549530865	0.000177352295404551	negative
C3orf36	DAOA-AS1	0.880825582788629	2.98370773222962e-12	postive
C3orf49	DAOA-AS1	0.755726882484099	1.53330155345365e-07	postive
C4orf36	DAOA-AS1	0.611238761082567	9.59915607243859e-05	postive
C4orf46	DAOA-AS1	0.716550444786618	1.2904467765857e-06	postive
C5orf22	DAOA-AS1	0.570845812298668	0.000342286370508764	postive
C6orf201	DAOA-AS1	0.876002033455965	5.5321019088212e-12	postive
C7orf33	DAOA-AS1	0.613947152546362	8.75977880906089e-05	postive
C7orf57	DAOA-AS1	0.728356065090806	7.05672455580693e-07	postive
C9orf57	DAOA-AS1	0.645202800248403	2.85752309342878e-05	postive
CABP2	DAOA-AS1	0.603793119250201	0.000122922052413542	postive
CABS1	DAOA-AS1	0.963094093751659	2.21498562806786e-20	postive
CAGE1	DAOA-AS1	0.922544864905637	3.35390160897806e-15	postive
CBLN4	DAOA-AS1	0.66973063337761	1.08223925069674e-05	postive
CCDC54	DAOA-AS1	0.851757004789286	8.72380616838987e-11	postive
CCDC60	DAOA-AS1	0.846165547593173	1.53812200113402e-10	postive
CCDC62	DAOA-AS1	0.538745797820581	0.000841018940176031	postive
CCDC70	DAOA-AS1	0.894451795701936	4.46892689798337e-13	postive
CCL25	DAOA-AS1	0.728210931871239	7.11061422472164e-07	postive
CD160	DAOA-AS1	0.735206782893019	4.90047362374694e-07	postive
CD209	DAOA-AS1	0.613379480440604	8.93002692292617e-05	postive
CD300LD	DAOA-AS1	0.716504595936557	1.29339962994894e-06	postive
CD7	DAOA-AS1	-0.553341724656133	0.000565140388883103	negative
CDH8	DAOA-AS1	0.654110848743762	2.02863678985397e-05	postive
CDK5R1	DAOA-AS1	-0.585215058958925	0.000221965827841614	negative
CDKL4	DAOA-AS1	0.714705540627094	1.41426966706493e-06	postive
CDNF	DAOA-AS1	0.576109125361777	0.000292751468882506	postive
CDRT15	DAOA-AS1	0.593523260546576	0.000171178705050409	postive
CELF6	DAOA-AS1	0.620405398495327	7.01845554103729e-05	postive
CENPB	DAOA-AS1	-0.547995984443025	0.000655092047745297	negative
CEP97	DAOA-AS1	0.568402726542577	0.00036771858199449	postive
CER1	DAOA-AS1	0.829496661260186	7.3651101545629e-10	postive
CFHR2	DAOA-AS1	0.923229599799848	2.91185793913581e-15	postive
CFHR5	DAOA-AS1	0.900763271252141	1.69570174150034e-13	postive
CHRNA7	DAOA-AS1	0.563235935936281	0.000427119763703609	postive
CIITA	DAOA-AS1	0.564110584869131	0.000416500471858871	postive
CILP2	DAOA-AS1	0.790130330355976	1.65681389475366e-08	postive
CLEC18A	DAOA-AS1	0.703889349219651	2.38667693828349e-06	postive
CLVS1	DAOA-AS1	0.726694657738333	7.69663697755987e-07	postive
CNGB1	DAOA-AS1	0.59094458569901	0.000185695365800798	postive
CNGB3	DAOA-AS1	0.862936491443268	2.61054762634292e-11	postive
CNNM1	DAOA-AS1	0.581465598636165	0.000249008960728441	postive
CNPPD1	DAOA-AS1	0.643292145338955	3.07104550073428e-05	postive
CNTN5	DAOA-AS1	0.574645677349075	0.000305837811532263	postive
COG6	DAOA-AS1	0.699725582073641	2.90157987892888e-06	postive
COL20A1	DAOA-AS1	0.588419407561522	0.000200969499183043	postive
COL22A1	DAOA-AS1	0.640511910530113	3.40758996460284e-05	postive
CPA2	DAOA-AS1	0.670588917380498	1.04439405057385e-05	postive
CPLX4	DAOA-AS1	0.795501129125793	1.12791789840257e-08	postive
CPO	DAOA-AS1	0.639730877749088	3.50795539155888e-05	postive
CREG2	DAOA-AS1	0.667606134104805	1.18134002063727e-05	postive
CRISP1	DAOA-AS1	0.840577413834086	2.65224541862713e-10	postive
CRISP3	DAOA-AS1	0.695423115059106	3.53851567889268e-06	postive
CRP	DAOA-AS1	0.547848253366687	0.0006577484640789	postive
CRYBA4	DAOA-AS1	0.549470354646886	0.0006290970838639	postive
CSH1	DAOA-AS1	-0.623824184073485	6.22903700525141e-05	negative
CSH2	DAOA-AS1	0.712749959072836	1.557319515343e-06	postive
CSHL1	DAOA-AS1	-0.676757211567998	8.05893417412909e-06	negative
CSN2	DAOA-AS1	0.782429936682058	2.82155198733674e-08	postive
CTXN3	DAOA-AS1	0.536359657479271	0.000895970696515299	postive
CXorf51A	DAOA-AS1	0.696416333348188	3.38108833047327e-06	postive
CXorf58	DAOA-AS1	0.761767727868809	1.06575493902241e-07	postive
CYB5D1	DAOA-AS1	0.587930248873311	0.000204055056988794	postive
CYLC1	DAOA-AS1	0.933630196287931	2.85157355037588e-16	postive
CYLC2	DAOA-AS1	0.601529201022089	0.000132360067317501	postive
CYP1A1	DAOA-AS1	0.645944151650664	2.7783612092453e-05	postive
CYP2E1	DAOA-AS1	0.586666453003073	0.000212224130354736	postive
CYP4A11	DAOA-AS1	-0.661721239442573	1.50043466870806e-05	negative
CYP7A1	DAOA-AS1	0.709773294549134	1.8006239888284e-06	postive
CYSLTR2	DAOA-AS1	0.702838717535315	2.50805112475923e-06	postive
DAOA	DAOA-AS1	0.850201745676491	1.02377963722289e-10	postive
DCAF12L1	DAOA-AS1	0.535513089956465	0.000916215415568028	postive
DCC	DAOA-AS1	0.649920653120308	2.38663871842016e-05	postive
DCDC1	DAOA-AS1	0.861547426868081	3.04994015455471e-11	postive
DCHS2	DAOA-AS1	0.652474827605664	2.16217191895433e-05	postive
DCST1	DAOA-AS1	-0.565205959391126	0.000403533029065383	negative
DDHD1	DAOA-AS1	0.547266574858073	0.000668300890992301	postive
DDI1	DAOA-AS1	0.53310842699307	0.000975940599400565	postive
DDX53	DAOA-AS1	0.688375770620762	4.86237095277056e-06	postive
DEFA5	DAOA-AS1	0.546655682315776	0.000679544509400304	postive
DEFB118	DAOA-AS1	0.572503408301856	0.000325935867099025	postive
DEFB125	DAOA-AS1	0.940918042985587	4.41949151308023e-17	postive
DKKL1	DAOA-AS1	0.58713513025102	0.000209161122329982	postive
DLEU7	DAOA-AS1	0.605959593361689	0.00011446084189956	postive
DMRT3	DAOA-AS1	0.556503732717145	0.000517255067643576	postive
DNAJB7	DAOA-AS1	0.958529130906061	1.46657740808022e-19	postive
DNAJC3	DAOA-AS1	0.674984258527815	8.68777593577682e-06	postive
DNAJC6	DAOA-AS1	0.723064936607597	9.28381437230044e-07	postive
DNER	DAOA-AS1	0.559037275841855	0.000481524306179487	postive
DOCK10	DAOA-AS1	0.705645862694118	2.19568881276478e-06	postive
DOCK8	DAOA-AS1	0.780977000760881	3.1122650762992e-08	postive
DPP10	DAOA-AS1	0.565502638153075	0.000400083264935027	postive
DRD3	DAOA-AS1	-0.616619220509408	7.99698905872829e-05	negative
DRD4	DAOA-AS1	0.546713657768034	0.000678470308529628	postive
DSC1	DAOA-AS1	0.574940707966862	0.000303158375362028	postive
DSG3	DAOA-AS1	0.575332376722215	0.000299633646996214	postive
DSG4	DAOA-AS1	0.896613660787037	3.22925975511889e-13	postive
DSPP	DAOA-AS1	0.764082891717166	9.24462611810945e-08	postive
DTHD1	DAOA-AS1	0.992045624709695	2.76121791837753e-31	postive
DTX2	DAOA-AS1	0.682843841551291	6.20231932576707e-06	postive
DUSP21	DAOA-AS1	0.587355814297463	0.000207732603160906	postive
DYDC1	DAOA-AS1	0.580957239920439	0.000252893546388154	postive
DZIP1L	DAOA-AS1	0.69024731202518	4.47266065573705e-06	postive
EBF2	DAOA-AS1	-0.535535131451937	0.000915683239159096	negative
EBNA1BP2	DAOA-AS1	0.616590972437987	8.00472967548249e-05	postive
ECT2L	DAOA-AS1	0.778426732350127	3.69029787792969e-08	postive
EDDM3A	DAOA-AS1	0.620103749741554	7.09226047547078e-05	postive
EFCAB3	DAOA-AS1	0.766400694544519	8.00479693012611e-08	postive
EID3	DAOA-AS1	0.61516825861547	8.40342312632542e-05	postive
EMD	DAOA-AS1	0.663311106873733	1.40729917463877e-05	postive
ETV3L	DAOA-AS1	0.6620124365662	1.48296848031141e-05	postive
EXD1	DAOA-AS1	-0.617747358839868	7.69330901718736e-05	negative
EXOC6B	DAOA-AS1	0.622311375323159	6.56790200629441e-05	postive
EYS	DAOA-AS1	0.588540691875898	0.000200210941763262	postive
F13B	DAOA-AS1	0.564682138406272	0.0004096886810518	postive
F3	DAOA-AS1	0.683423262828153	6.04767628578357e-06	postive
FABP12	DAOA-AS1	0.541682296896036	0.000777495771117699	postive
FABP2	DAOA-AS1	0.914209142293232	1.70036662870638e-14	postive
FAM13C	DAOA-AS1	0.641028825343919	3.34260084868924e-05	postive
FAM205A	DAOA-AS1	0.641811182882723	3.24637017518195e-05	postive
FAM71E2	DAOA-AS1	0.764888386621685	8.79499572622581e-08	postive
FAM98B	DAOA-AS1	0.594453055990316	0.000166199331616294	postive
FARP2	DAOA-AS1	0.534765981083031	0.000934416122046381	postive
FCER1A	DAOA-AS1	0.59892709528202	0.000144007553618595	postive
FCER1G	DAOA-AS1	0.654806949166751	1.97412349198261e-05	postive
FCRL1	DAOA-AS1	0.575631116997349	0.000296969837030652	postive
FERMT1	DAOA-AS1	0.706580264161296	2.09988483836309e-06	postive
FGF16	DAOA-AS1	0.700228591285419	2.83439802911835e-06	postive
FLG	DAOA-AS1	0.62401443188045	6.18755758776149e-05	postive
FNDC5	DAOA-AS1	0.542356353592057	0.000763527879174812	postive
FNDC7	DAOA-AS1	0.822997679449405	1.29683598257125e-09	postive
FOLR2	DAOA-AS1	0.6481760718625	2.55187608600697e-05	postive
FOXI1	DAOA-AS1	0.577397078101675	0.000281650343099871	postive
FOXN1	DAOA-AS1	-0.67383172874984	9.12017438826577e-06	negative
FSCB	DAOA-AS1	0.809723894523013	3.84767138167736e-09	postive
FSHB	DAOA-AS1	0.843012231703916	2.09720187543044e-10	postive
GABRA4	DAOA-AS1	0.764660054109529	8.92036064867169e-08	postive
GABRR3	DAOA-AS1	-0.542247303445739	0.00076577246554179	negative
GAL3ST1	DAOA-AS1	0.603701987125148	0.000123289971632563	postive
GALP	DAOA-AS1	0.566307472021632	0.00039085653448598	postive
GAPDHS	DAOA-AS1	0.877644878087192	4.49606313790198e-12	postive
GCG	DAOA-AS1	0.859061293308897	4.01245167406423e-11	postive
GFM1	DAOA-AS1	0.717256661296795	1.24573650613354e-06	postive
GFRAL	DAOA-AS1	0.991383871019596	1.02717321371157e-30	postive
GH1	DAOA-AS1	-0.630478223841596	4.91801085442128e-05	negative
GJA10	DAOA-AS1	0.931967765547524	4.23569417303215e-16	postive
GK	DAOA-AS1	0.745541767266277	2.76700507051813e-07	postive
GK2	DAOA-AS1	0.923390652448296	2.81611747527469e-15	postive
GKN1	DAOA-AS1	0.559418032352719	0.000476348522028178	postive
GLIPR1L1	DAOA-AS1	0.92170228816839	3.98392343813259e-15	postive
GLP1R	DAOA-AS1	0.83308668338451	5.33343068535286e-10	postive
GNG3	DAOA-AS1	0.650226559279162	2.35868511663229e-05	postive
GNGT2	DAOA-AS1	0.642140187687276	3.2066565126386e-05	postive
GNRHR	DAOA-AS1	0.701243573968176	2.70314432634474e-06	postive
GORASP1	DAOA-AS1	0.537417468902015	0.000871230259231627	postive
GPR101	DAOA-AS1	0.792679438329644	1.38235508354284e-08	postive
GPR31	DAOA-AS1	-0.597760865978506	0.000149519939550053	negative
GPR82	DAOA-AS1	0.556541549643611	0.000516704880376449	postive
GPRC6A	DAOA-AS1	0.56103753752792	0.000454882039757061	postive
GPX5	DAOA-AS1	-0.564630987704612	0.000410294231008378	negative
GPX6	DAOA-AS1	0.697589772472812	3.20334994573588e-06	postive
GRIK1	DAOA-AS1	0.693155921386518	3.92324827808597e-06	postive
GRK7	DAOA-AS1	0.877795115933309	4.41095339067894e-12	postive
GRXCR1	DAOA-AS1	0.768913905856276	6.83487524690926e-08	postive
GSX2	DAOA-AS1	0.597422345762424	0.000151155068344373	postive
GUCA1C	DAOA-AS1	0.590567290130081	0.000187909342165547	postive
GUCY2D	DAOA-AS1	0.696184172304262	3.41730256019407e-06	postive
GUCY2F	DAOA-AS1	0.651644340083506	2.23296297207308e-05	postive
GYS2	DAOA-AS1	0.913597996950113	1.90279347510891e-14	postive
H6PD	DAOA-AS1	0.621418899615813	6.77552192756112e-05	postive
HDDC2	DAOA-AS1	0.554931860270771	0.000540589090920798	postive
HECTD3	DAOA-AS1	0.653666564179578	2.06413974090354e-05	postive
HHLA1	DAOA-AS1	0.55514738140863	0.000537335438534066	postive
HHLA2	DAOA-AS1	0.800213019492002	7.97381233208694e-09	postive
HIPK4	DAOA-AS1	0.534961688812641	0.000929617791967604	postive
HNF4A	DAOA-AS1	0.645526263309069	2.82273579160765e-05	postive
HNF4G	DAOA-AS1	0.591006946890764	0.000185331687620826	postive
HOXB1	DAOA-AS1	0.691162886012118	4.29258565941576e-06	postive
HOXC4	DAOA-AS1	0.699120294899547	2.98434893054356e-06	postive
HOXD12	DAOA-AS1	0.719225818684295	1.1284558312334e-06	postive
HRH2	DAOA-AS1	-0.608447996662134	0.000105390817052906	negative
HRH4	DAOA-AS1	0.963494797577299	1.85539096030212e-20	postive
HSFY2	DAOA-AS1	0.872785561451023	8.23354217165284e-12	postive
HTN3	DAOA-AS1	0.894552471852669	4.40250851371092e-13	postive
HTR1B	DAOA-AS1	-0.611405191007173	9.54556281563604e-05	negative
HTR3B	DAOA-AS1	0.578518106602768	0.000272295523506661	postive
HYAL4	DAOA-AS1	-0.566249996000775	0.000391509109677183	negative
IFNA10	DAOA-AS1	0.797616336018317	9.66390437841638e-09	postive
IFNA16	DAOA-AS1	0.617119269441714	7.86107529788939e-05	postive
IFNA2	DAOA-AS1	0.678050329600668	7.62673048812195e-06	postive
IFNA8	DAOA-AS1	0.650857315077929	2.30198136873904e-05	postive
IFNK	DAOA-AS1	0.971499948246318	3.31371244036693e-22	postive
IFNW1	DAOA-AS1	0.684866368382868	5.67767373199737e-06	postive
IL12B	DAOA-AS1	0.675057656691696	8.66088136934535e-06	postive
IL15	DAOA-AS1	0.654256693992458	2.01710354281345e-05	postive
IL2	DAOA-AS1	0.702032288560441	2.60501183187064e-06	postive
IL23R	DAOA-AS1	0.737893682602465	4.23454985529731e-07	postive
IL3	DAOA-AS1	0.699488859484035	2.93369715122216e-06	postive
IL9	DAOA-AS1	0.783472283304118	2.62866900268646e-08	postive
IL9R	DAOA-AS1	0.63109955105592	4.80932871004443e-05	postive
IMPG1	DAOA-AS1	0.789519156361261	1.72970524247018e-08	postive
INSL6	DAOA-AS1	0.839184162009353	3.02834553265981e-10	postive
IQCF1	DAOA-AS1	0.692185814707579	4.09923702891351e-06	postive
IQCF5	DAOA-AS1	0.985205862557092	7.34112415097299e-27	postive
[truncated: 16,811 more rows]
